# Supplementary material
Source: PubMed Central journal article supplement (PMC4129405)
Supplement: mmc1.pdf [file mmc1.pdf]

The American Journal of Human Genetics, Volume 95

Supplemental Data

**The *Alu*-Rich Genomic Architecture of *SPAST*  
Predisposes to Diverse and Functionally Distinct  
Disease-Associated CNV Alleles**

Philip M. Boone, Bo Yuan, Ian M. Campbell, Jennifer C. Scull, Marjorie A. Withers, Brett C. Baggett, Christine R. Beck, Christine J. Shaw, Pawel Stankiewicz, Paolo Moretti, Wendy E. Goodwin, Nichole Hein, John K. Fink, Moon-Woo Seong, Soo Hyun Seo, Sung Sup Park, Izabela D. Karbassi, Sat Dev Batish, Andrés Ordóñez-Ugalde, Beatriz Quintáns, María-Jesús Sobrido, Susanne Stemmler, and James R. Lupski

## Supplemental Figures

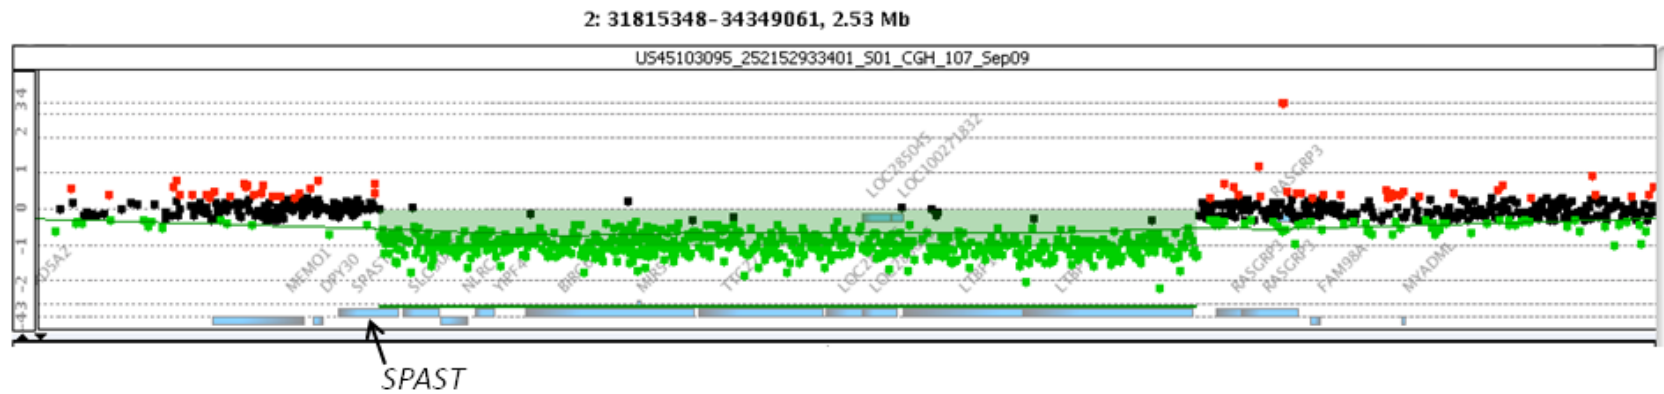

**Figure S1. Array CGH result for Ruhr 29.** The CNV in subject Ruhr 29 spanned beyond the boundaries of the custom array. Thus, a 1M probe genome-wide array was used to confirm and map this subject's deletion.

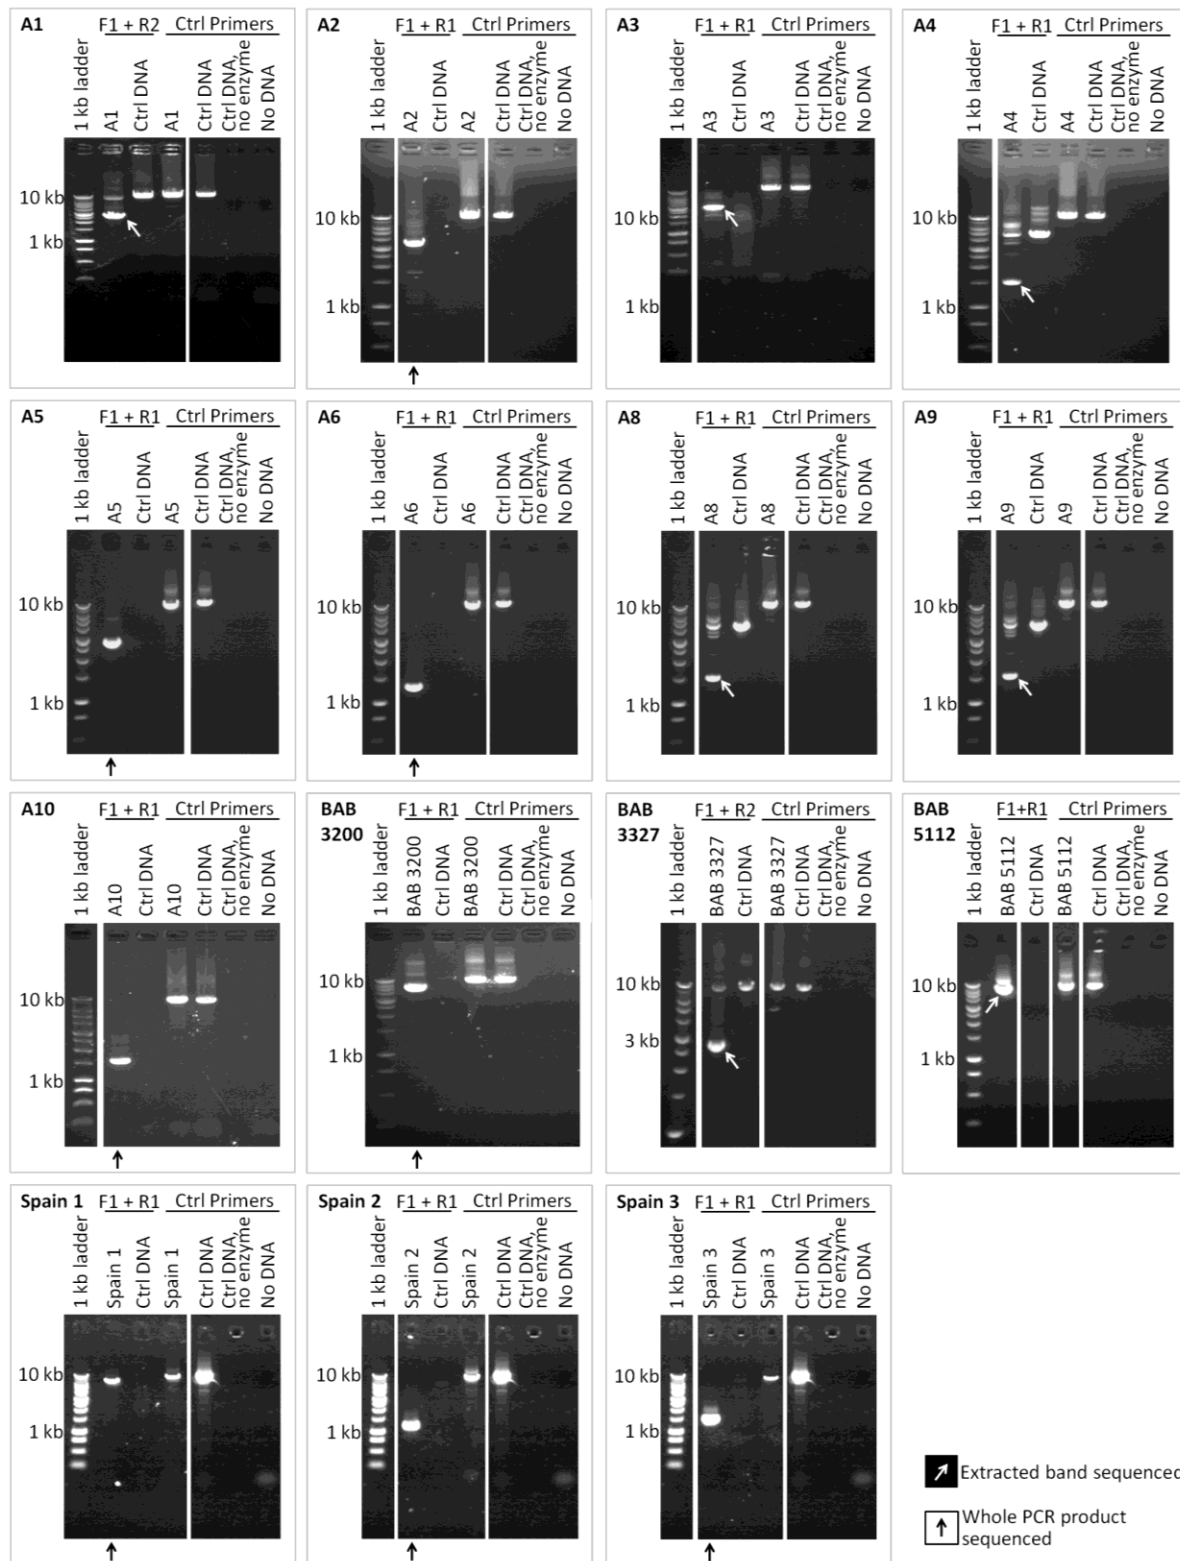

**Figure S2. CNV breakpoint PCRs.** Note that no PCR product was obtained for Ruhr 32. This may be a complex CNV.

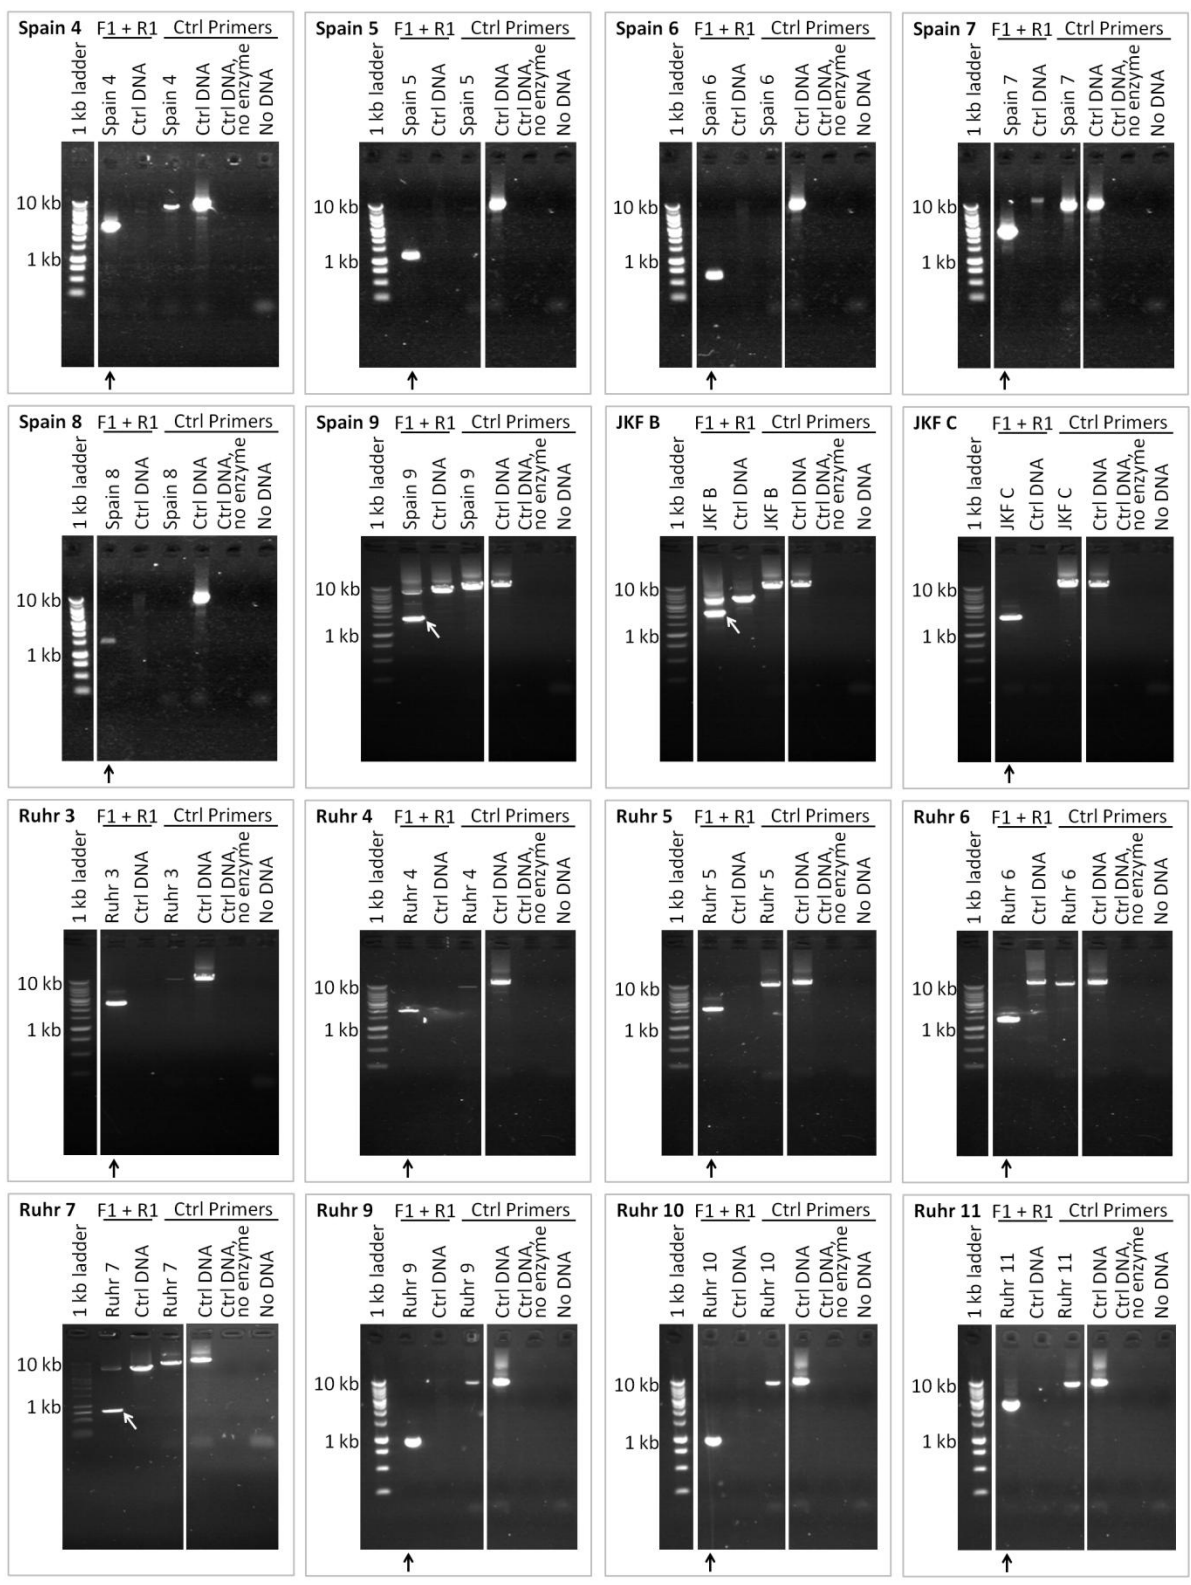

Figure S2, cont'd.

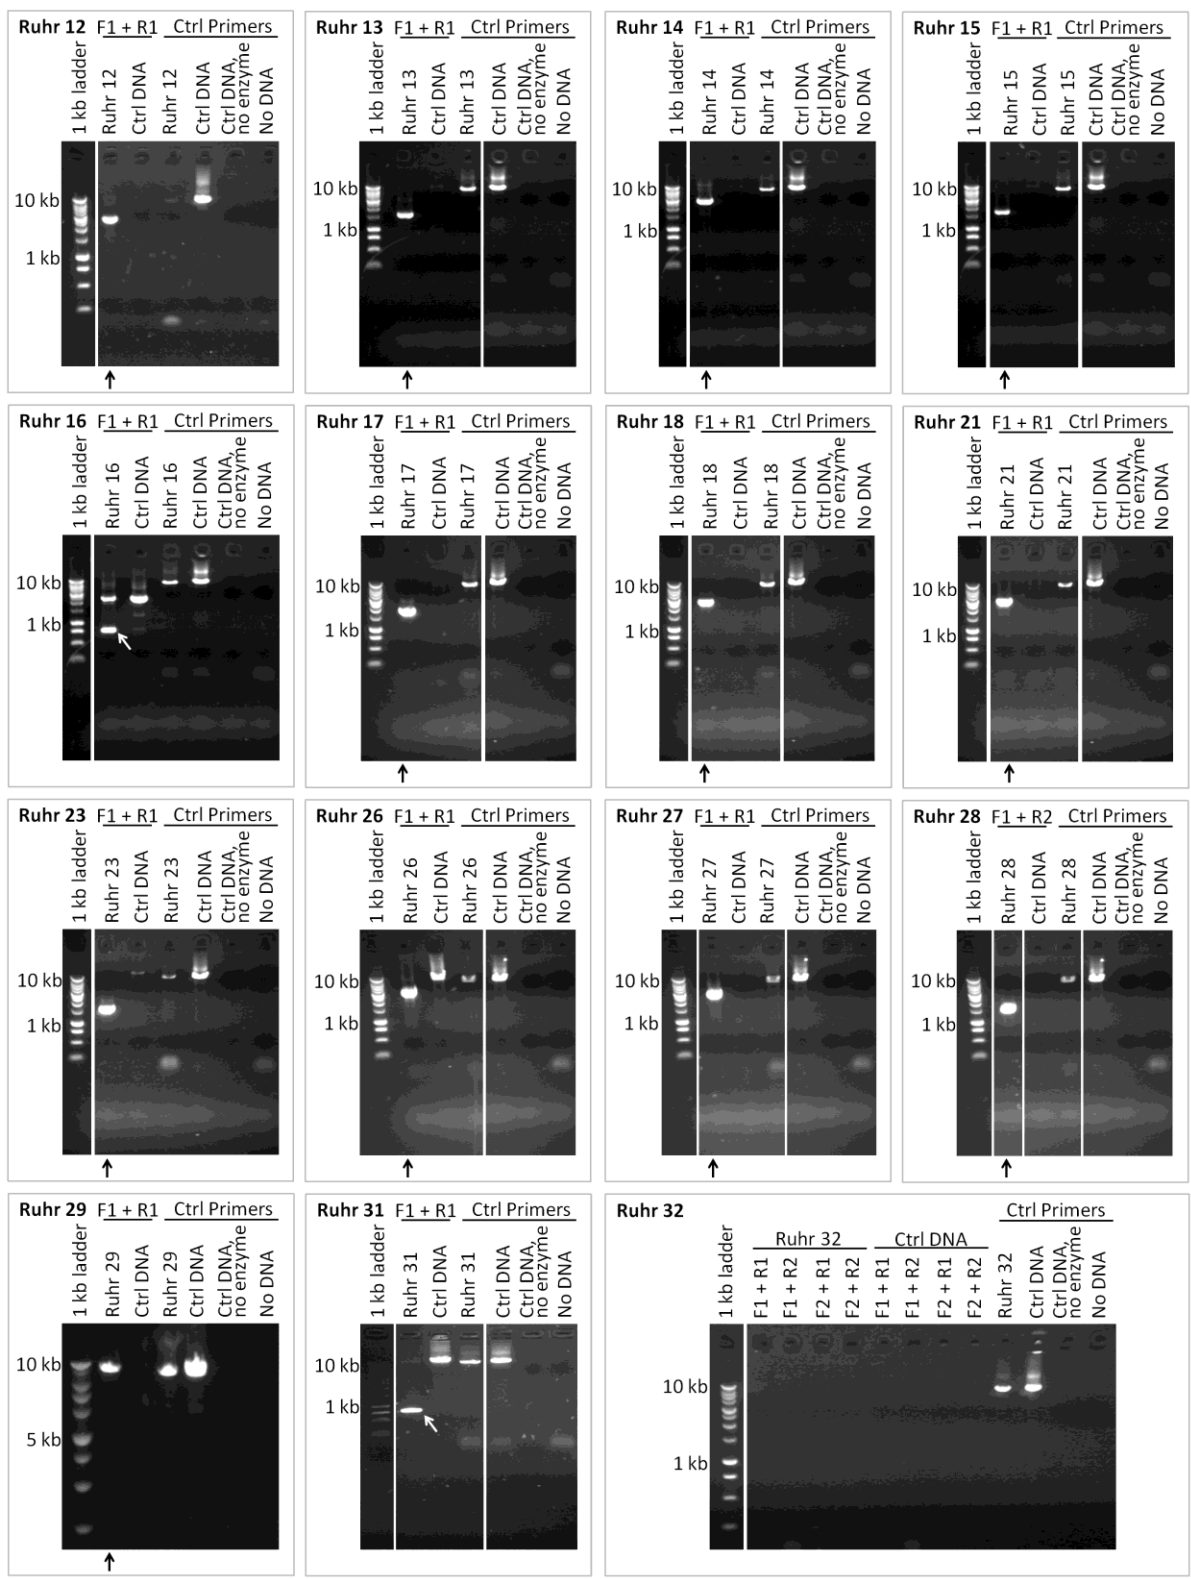

Figure S2, cont'd.

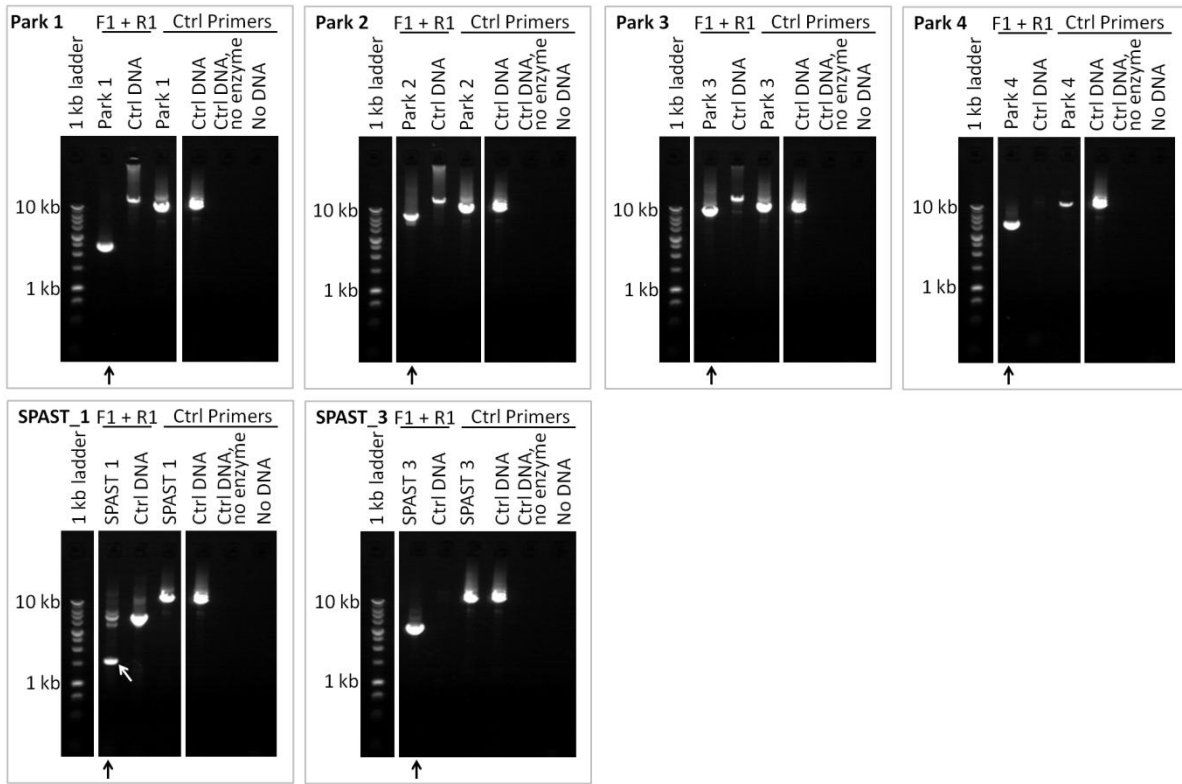

**Figure S2, cont'd.**

**A1**

Reverse complement sequence

```

Chr2:32378859 CTTTAGGCTGGGCAAAGTGGCTCACGTCTGTAATCCAGCACTTTGGGAGGCCAAGGTGGGCGGATCACCTGAGGTTAGG 32378937
|||||
A1 305 CTTTAGGCTGGGCAAAGTGGCTCACGTCTGTAATCCAGCACTTTGGGAGGCCGAGACAGGCGGATCACA--AGGTTAGG 229
| |||||
chr2:32384360 TAATTGGCTGGGCGCGGTGGCTCACGCCTGTAATCCAGCACTTTGGGAGGCCGAGACAGGCAGATCACA--AGGTCAGG 32384437
rs187211683* *rs4519572 rs4407291* *rs4530415

```

At underlined bases marked with "\*", a known SNP exists that matches the patient sequence, potentially explaining the difference between the patient and reference genomes at that position. No other known SNPs underlie any differences (dbSNP135 via UCSC Genome Browser).

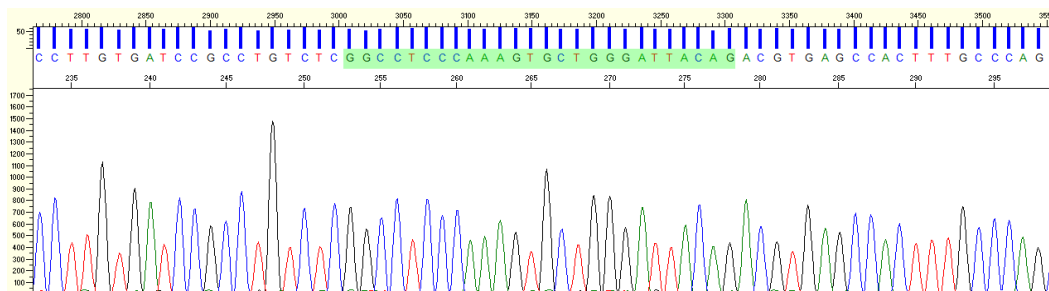

**Figure S3. CNV breakpoint sequences.** (Top) For each CNV, the “upstream” (telomeric, above) and “downstream” (centromeric, below) reference genomic sequences are aligned with sequence obtained from the breakpoint PCR product (middle). The direction in which the breakpoint PCR product was sequenced (forward vs. reverse) is noted. Blue, bold text indicates identity between the breakpoint sequence and one part of the reference genome; pink, bold text indicates “microhomology” (a short stretch of identity between the upstream and downstream genomic sequences flanking a CNV breakpoint). Known SNPs that could potentially alter interpretation are shown. Some breakpoints are complex and/or can be interpreted in multiple ways (see figure). (Bottom) Chromatogram of breakpoint PCR product sequence, with microhomology (if any) highlighted.







**A6**

Reverse complement sequence

Chr2:32372785 CTGCCTCCCGGGTTCACGCCATTCTCCTGCCTCAGCCTCCCTAGTAGCTGGGACTACAGG 32372844

A6 608 CTGCCTCCCGGGTTCACGCCATTCTCCTGCCTCAGCCTCCCAAGTAGCTGGAAATAGAGG 549

Chr2:32398527 CTGCTTCCCTGGTTCAAGCGATTCTCCTGCCTCAGCCTCCCAAGTAGCTGGAAATAGAGG 32398586

No known SNPs underlie any differences (dbSNP135 via UCSC Genome Browser).

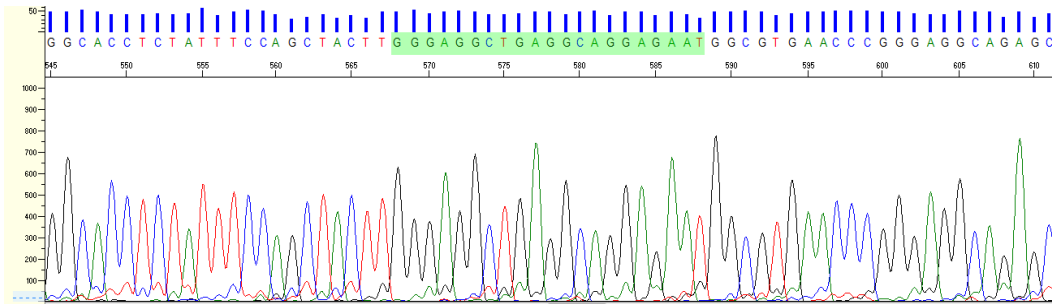**A8**

Reverse complement sequence

Chr2:32378537 CA-----C-CT-GCCTGGCTAATTTTGTATTTTAGTGGAGACGGGGTTTCACCATGTT 32378589

A8 511 CA-----C-CT-GCCTGGCTAATTTTGTATTTTAGTAGAGATGGGGTTTCTCCATGTT 459

Chr2:32381252 CATGCGCCACTACCCAGCTAA-TTTTGTATTTTAGTAGAGATGGGGTTTCTCCATGTT 32381310

No known SNPs underlie any differences (dbSNP135 via UCSC Genome Browser).

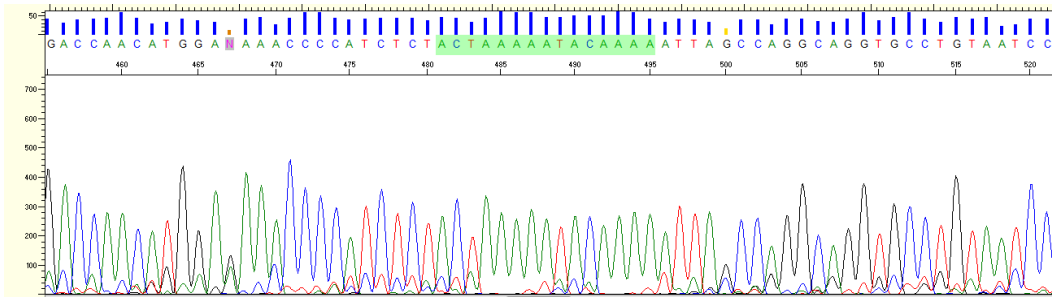

Figure S3, cont'd.



**BAB 3200**

Forward sequence

*Rendered as a 16 bp insertion*

```

Chr2:32260417 AATCCCAGCACTTTGGGAGGCCGAGGCGGGTGGATCACGAGGTCAGGAGATCAAGACCATCCTGGCCA 32260484
              ||| ||| ||| ||| ||| ||| ||| ||| ||| ||| ||| ||| ||| ||| ||| ||| ||| ||| |||
BAB 3200 173 AATCCCAGCACTTTGGGAGGCCGAGGTGGGCAGATCACCTGAGCTGAAATTACTGTTTTATAGGTCA 240
              ||| ||| ||| ||| ||| ||| ||| ||| ||| ||| ||| ||| ||| ||| ||| ||| ||| |||
Chr2:32347647 TCCCAAAGTGCTGGGATTACAGGTATGAGCCACCACACCTGGGCTGAAATTACTGTTTTATAGGTCA 32347714

```

No known SNPs underlie any differences (dbSNP135 via UCSC Genome Browser).

*Rendered as a template switch x 2 (with a locus ~13 kb away)*

```

BAB 3200 173 AATCCCAGCACTTTGGGAGGCCGAGGTGGGCAGATCACCTGAGCTGAAATTACTGTTTTATAGGTCA 240
              ||| ||| ||| ||| ||| ||| ||| ||| ||| ||| ||| ||| ||| ||| ||| ||| ||| |||
Chr2:32260417 AATCCCAGCACTTTGGGAGGCCGAGGCGGGTGGATCACGAGGTCAGGAGATCAAGACCATCCTGGCCA 32260484
              ||| ||| ||| ||| ||| ||| ||| ||| ||| ||| ||| ||| ||| ||| ||| ||| ||| |||
Chr2:32247023 AATCCTAGCACTTTGGGAGGCTGAGGTGGGCAGATCACCTGAGGTCAGGAATTCGAGACCAGCCTGGC 32247090
              ||| ||| ||| ||| ||| ||| ||| ||| ||| ||| ||| ||| ||| ||| ||| ||| ||| |||
Chr2:32347647 TCCCAAAGTGCTGGGATTACAGGTATGAGCCACCACACCTGGGCTGAAATTACTGTTTTATAGGTCA 32347714

```

No known SNPs underlie any differences (dbSNP135 via UCSC Genome Browser).

This potential FoSTeS x 2 mechanism was rendered by searching for the 16bp insertion +/- 1 bp on either side using the UCSC "Short Match" feature to look within 200 kb of the CNV, and the middle genomic sequence was the most closely located result.

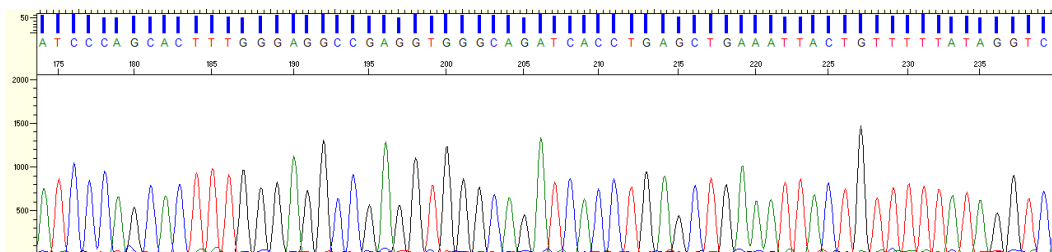**Figure S3, cont'd.**



**SPAST 1**

Forward sequence

Chr2:32378515 AGCTGGGATTACAGGCACCTGCCTG-----GCTAATTTTGTATTTTAGTGGAGACGGGGTTTCACCATGTTGGCCAGGCTGGTCTCG 32378605  
 KCL133376 510 AGCTGGGATTACAGGCACCTGCCTG-----GCTAATTTTGTATTTTAGTAGAGATGGGGTTTCTCCATGTTGGTCAGGCTGGTCTTG 600  
 Chr2:32381237 AGCTGGGATTACAGGCATGCGCCACTACCCAGCTAA-TTTTGTATTTTAGTAGAGATGGGGTTTCTCCATGTTGGTCAGGCTGGTCTTG 32381326

No known SNPs underlie any differences (dbSNP137 via UCSC Genome Browser).

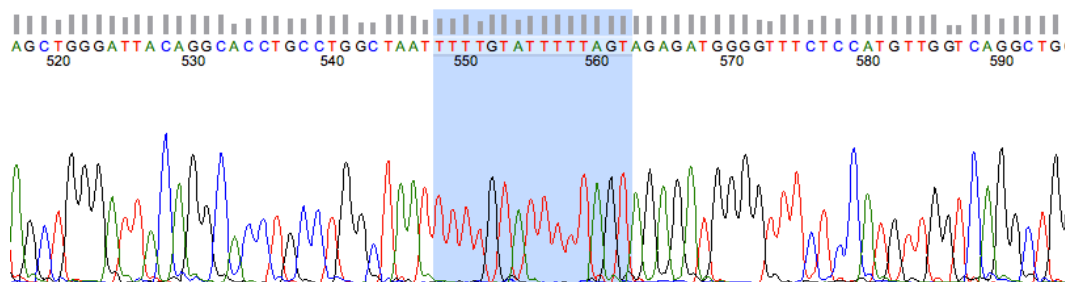**SPAST 3**

Forward sequence

Chr2:32726526 TCCATTCGGGTTATGTGTAGAGGGTTTAGACAGCTATTATATATTCATTCTTCAGCAGTTTTGGAAAAAGTG 32726597  
 KCL186204 938 TCCATTCGGGTTATGTGTAGAGGGTTTAGACAGCTATTTTTGTACTTTAGTCTTAATCCAGTGGTTGAAAGA 1009  
 Chr2:32294329 TATCTATCTTAAATTTTCTTTAGGAGATTGAA-TATTTTTGTACTTTAGTCTTAATCCAGTGGTTGAAAGA 32294400

No known SNPs underlie any differences (dbSNP137 via UCSC Genome Browser).

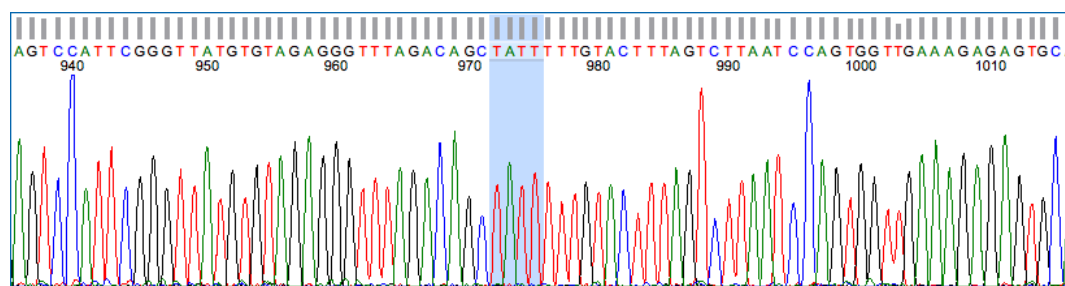**Figure S3, cont'd.**







**Spain 5**

Reverse complement sequence

Chr2:32282809 **CTCCTGACCTCAAGTGATCCACCTGTCTCGGCCTCCCAAAGTGCTGGGATTACAGG**CGTTAGCCACAGCATCCAGCCTTAAGCATG Chr2:32282894Spain 5 213 **CTCCTGACCTCAAGTGATCCACCTGTCTCGGCCTCCCAAAGTGCTGGGATTACAGGTATGACCCACTGCACCCAACCCATACTCAA** 128Chr2:32295360 CTCCTGACCTGAAGTGATCCGCCTGCCTCA**GCCTCCCAAAGTGCTGGGATTACAGGTATGACCCACTGCACCCAACCCATACTCAA** Chr2:32295445

No known SNPs underlie any differences (dbSNP137 via UCSC Genome Browser).

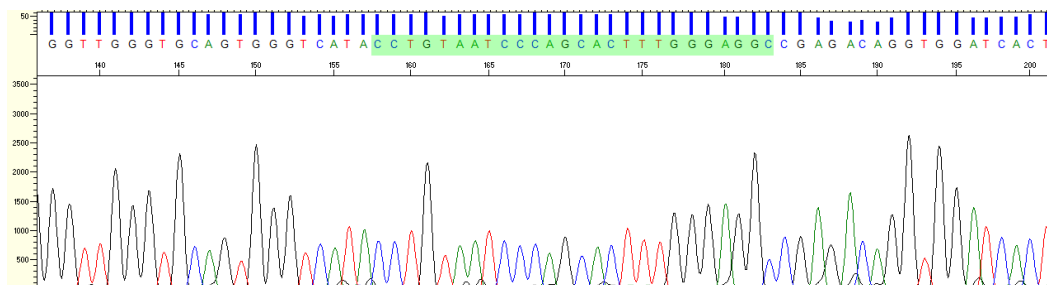**Spain 6**

Reverse complement sequence

Chr2:32302017 **TCACTGCAACCTCTGTTTCCAGGTTCAA**ACGATTCTCCTGCCTCAGCCTCCCAAGTAGC Chr2:32302076Spain 6 204 **TCACTGCAACCTCTGTTTCCAGGTTCAA**AGCTGAGTATCTTCTACAATTTCCAGATGA 145chr2:32472132 CAAGTAAACAACAGTTAGGGTGGGAACGG**AGCTGAGTATCTTCTACAATTTCCAGATGA** Chr2:32472191

No known SNPs underlie any differences (dbSNP137 via UCSC Genome Browser).

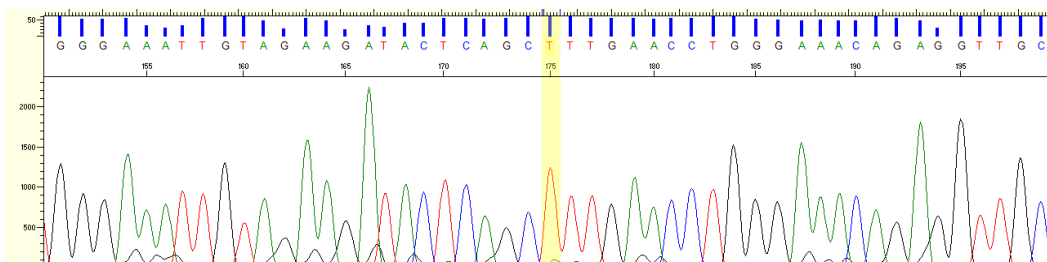**Figure S3, cont'd.**



**Spain 9**

Forward sequence

chr2:32340370 **TCATTAGACATTTAATACCAAGTTTGGCTT**ACCAG**TCTGTTTTATATAATGCTGTATATTCATT** 32340435  
 rs181046857\*  
 Spain 9 38 **TCATTAGACATTTAATACCAAGTTTGGCTT**ACCAG**GCTGGAGTACAGTGAATATTTAGTCTTTT** 103  
 chr2:32345390 CCTTCTACTCCTGTCTCCCACTTTTTTCTC**ACCAG**GCTGGAGTACAGTGAATATTTAGTCTTTT 32345455

At underlined bases marked with "\*", a known SNP exists that matches the patient sequence, potentially explaining the difference between the patient and reference genomes at that position. No other known SNPs underlie any differences (dbSNP137 via UCSC Genome Browser).

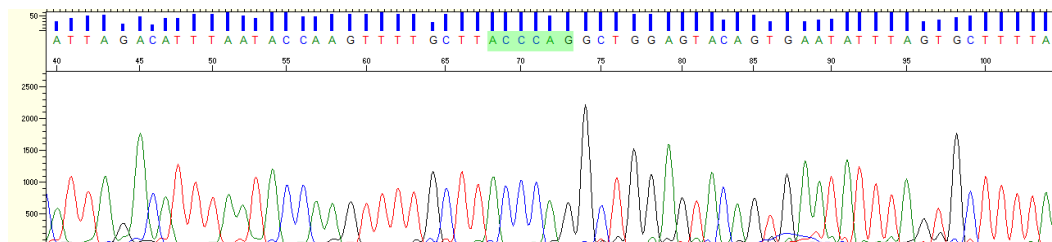**JKF B**

Forward sequence

chr2:32371871 **TGCAGTAAGCCGAGCACTGCAGCCTGGGCA**ACAGAGCAAGACT**TGCTCTCAAAAAAAAAAAAAAAAAAAAAAAAAA** 32371944  
 JKF B 226 **TGCAGTAAGCCGAGCACTGCAGCCTGGGCA**ACAGAGCAAGACT**CA**TCT**CAAAAAAAAAAAAAAAAAANNNNNNNN** 299  
 chr2:32373830 AGATCGTGCCACTGCAGCCTCCAGCCTGGGCG**ACAGAGCAAGACT**CA**TCT**CAAAAAAAAAAAAAAAAAATAGCTGGGC 32373903  
 \*rs9677320 \*Multiple SNPs

At underlined bases marked with "\*", a known SNP exists that matches the patient sequence, potentially explaining the difference between the patient and reference genomes at that position. No other known SNPs underlie any differences (dbSNP137 via UCSC Genome Browser).

The low-complexity region 3' of the breakpoint (poly-A) renders the sequence flanking the breakpoint somewhat less certain than in other subjects. Thus, this breakpoint may be considered provisional. This position of the breakpoint coincides with the length of the breakpoint PCR product (Supplemental Fig. S4).

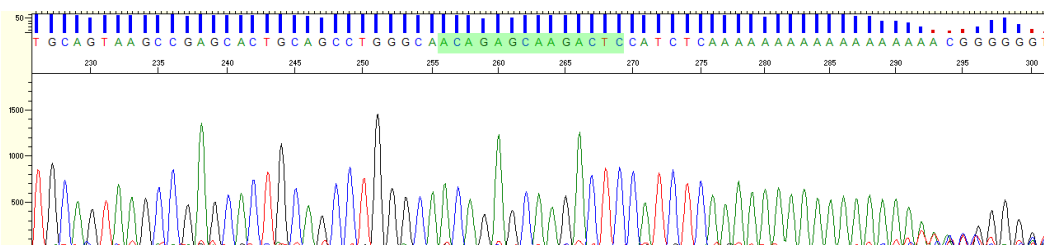**Figure S3, cont'd.**

**JKF C**

Reverse complement sequence

Chr2:32359860 **GTTCAGCAATTC**CCACGTCAGCCTCC**GAGTAGCTGGGATTACAGGCATGCGCCACCACGCC**CGGCTAATTTTGTAGTTTGTAGACACA Chr2:32359954  
 JKF C 376 **GTTCAGCAATTC**CCACGTCAGCCTCC**GAGTAGCTGGGATTACAGGCATGCGCCACCACGCC**TGACTAATTTTGTATTTTATTAGAGATG 282  
 Chr2:32353159 GTTCAAGCAATTCGCCACGTCAGCTTCCT**GAGTAGCTGGGATTACAGGCATGCGCCACCACGCC**TGACTAATTTTGTATTTTATTAGAGATG Chr2:32353253  
 \*rs188067254  
 \*rs216540

At underlined bases marked with "\*", a known SNP exists that matches the patient sequence, potentially explaining the difference between the patient and reference genomes at that position. No other known SNPs underlie any differences (dbSNP137 via UCSC Genome Browser).

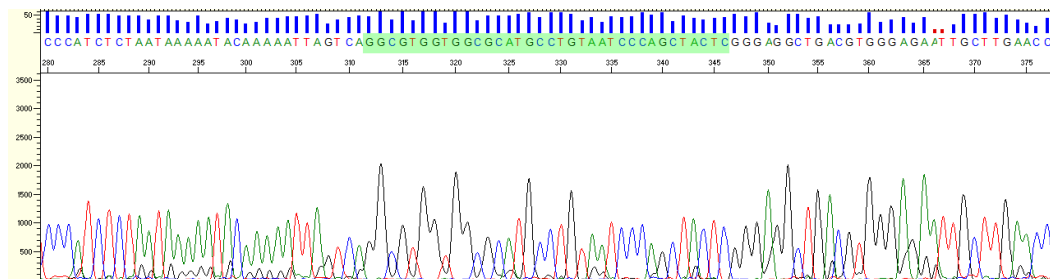**Ruhr 3**

Forward sequence

chr2:32291741 aaaaaaaGTAGGTCATTTTGGCTGGGCAC**GGTGGCTCATGCCTGTAATCCAGCACTTTGGGAGGCTGAGGTGGTGG** chr2:32291819  
 Ruhr 3 369 AAAAAAAGTAGGTCATTTTGGCTGGGCAC**GGTGGCTCATGCCTGTAATCCAGCACTTTGGGAGGCCAAGGCAGGTGG** 447  
 chr2:32357157 TTTACTTTTAAGAAAGTTGAGGCTAGGTGT**GGTGGCTCATGCCTGTAATCCAGCACTTTGGGAGGCCAAGGCAGGTGG** chr2:32357235

No known SNPs underlie any differences (dbSNP137 via UCSC Genome Browser).

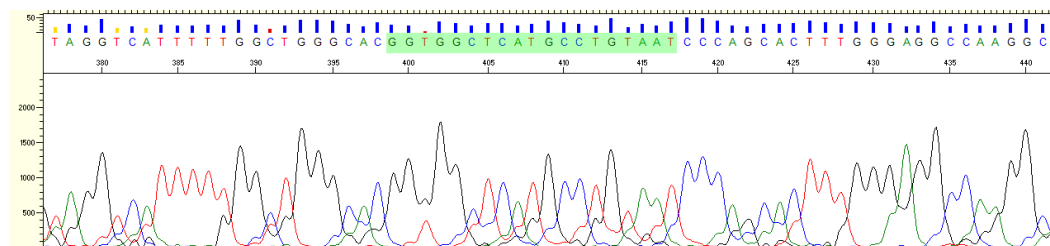

**Figure S3, cont'd.**





**Ruhr 9**

Forward sequence

Chr2:32288184 CCTCCCGAGTTCAAGCGATTCTCCGGCCTTAGCCTTCCAACCAGCTGGGACTACAGGCGCGGCC 32288248  
 |||||  
 Ruhr 9 486 CCTCCCGAGTTCAAGCGATTCTCCGGCCTTAGCCTCCTGAGCAGCTGGGATTACAGGTGTATGCC 550  
 |||||  
 Chr2:32292218 CCTCCCGGATTCAAGCGATTCTCCTGCCTCAGCCTCCTGAGCAGCTGGGATTACAGGTGTATGCC 32292282

No known SNPs underlie any differences (dbSNP137 via UCSC Genome Browser).

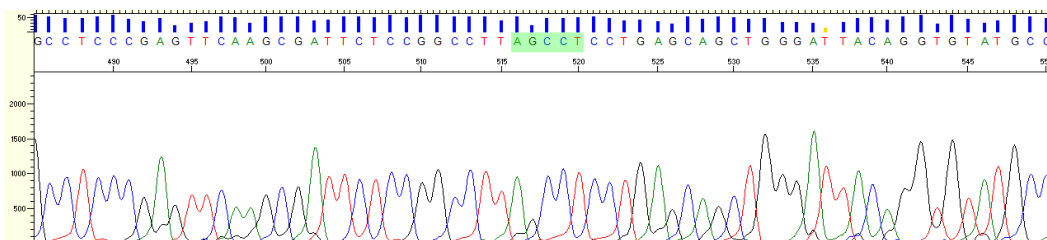**Ruhr 10**

Forward sequence

chr2:32288184 CCTCCCGAGTTCAAGCGATTCTCCGGCCTTAGCCTTCCAACCAGCTGGGACTACAGGCGCGGCC 32288248  
 |||||  
 Ruhr 10 487 CCTCCCGAGTTCAAGCGATTCTCCGGCCTTAGCCTCCTGAGCAGCTGGGATTACAGGTGTATGCC 551  
 |||||  
 chr2:32292218 CCTCCCGGATTCAAGCGATTCTCCTGCCTCAGCCTCCTGAGCAGCTGGGATTACAGGTGTATGCC 32292282

No known SNPs underlie any differences (dbSNP137 via UCSC Genome Browser).

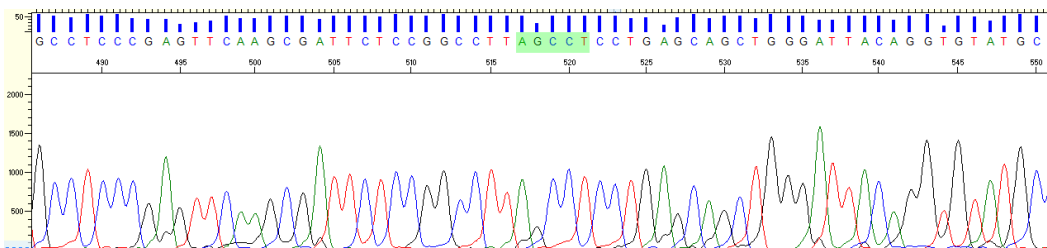**Figure S3, cont'd.**

**Ruhr 11**

Reverse complement sequence

chr2:32308107 **CACAGCTCACTGCAACCTCTGCCTCCCCG-GTCAAGTGATTCTCTGCCTCAGCCTCCCAAGTAGCTG** rs148709324\* TGATTACAGGTGCCCGCCACCACAACCAGC 32308204  
 |||||  
 Ruhr 11 422 **CACAGCTCACTGCAACCTCTGCCTCCCCG-GTCAAGTGATTCTCTGCCTCAGCCTCCCAAGTAGCTGGGATTACAGGCATGTGCCACTATGCCCAGC** 325  
 |||||  
 chr2:32341601 CTTAGCTCACTGCAACCTCTGCCTCCAGAA**TTCAAGTGATTCTCTGCCTCAGCCTCCCAAGTAGCTGGGATTACAGGCATGTGCCACTATGCCCAGC** 32341699

At underlined bases marked with "\*", a known SNP exists that matches the patient sequence, potentially explaining the difference between the patient and reference genomes at that position. No other known SNPs underlie any differences (dbSNP137 via UCSC Genome Browser).

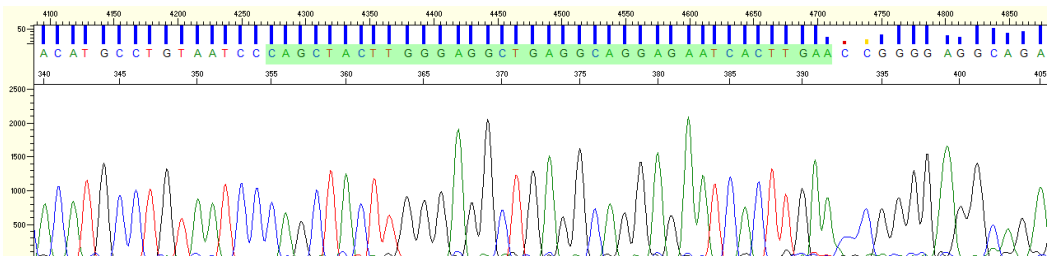**Ruhr 12**

Reverse complement sequence

chr2:32274877 **TTCTGTATTTTTAGTGGAGACGGAGTTTCTCCATGTTGG** TCAGGCTGGTCAGAACTCCCGACCTCAGG 32274945  
 |||||  
 Ruhr 12 205 **TTCTGTATTTTTAGTGGAGACGGAGTTTCTCCATGTTGGCCAGACTGGTCACGAACTCCTGACCTCAGG** 137  
 |||||  
 chr2:32291212 TTTTGTATTTTTAGTAGAGATGGTGTTC**CCATGTTGGCCAGACTGGTCACGAACTCCTGACCTCAGG** 32291280

No known SNPs underlie any differences (dbSNP137 via UCSC Genome Browser).

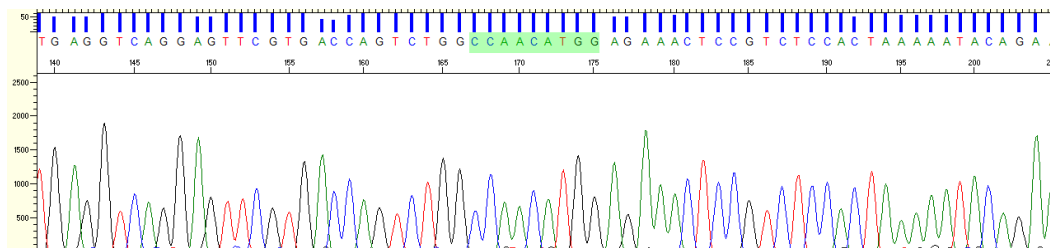

**Figure S3, cont'd.**





**Ruhr 15**

Reverse complement sequence

chr2:32291761 GGCTGGGCACGGTGGCTCATGCCTGTAATCCAGCACTTTGGGAGGCTGAGGTGGGTGGATTGCTTGAGCCCAGGAGTTGA 32291842  
 |||||  
 Ruhr 15 266 GGCTGGGCACGGTGGCTCATGCCTGTAATCCAGCACTTTGGGAGGCTGAGGCAGGTGGATCACCTGAGGTCAGGAGTTCGA 185  
 |||||  
 chr2:32364615 GGCTGGGCACAGTGGCTCATGCCTGTAATCCAGCACTTTGGGAGGCTGAGGCAGGTGGATCACCTGAGGTCAGGAGTTCGA 32364696

No known SNPs underlie any differences (dbSNP137 via UCSC Genome Browser).

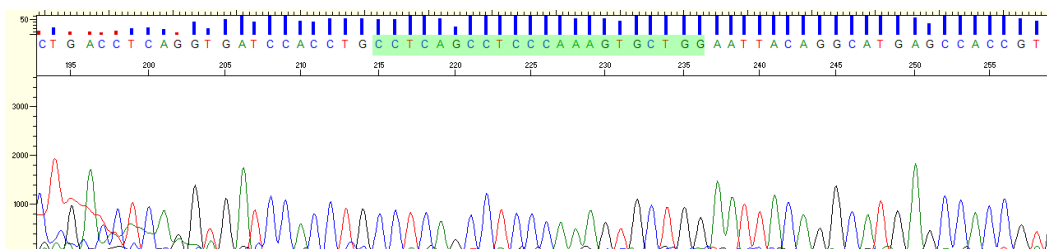**Ruhr 16**

Reverse complement sequence

chr2:32338390 GTGATCTGCCCGCTCAGCCTCCAAAATGCTGGGATTACAGGCGTGAGCTACTGCACCCGGCCTAAAATTGATTAGTTT 32338469  
 |||||  
 Ruhr 16 241 GTGATCTGCCCGCTCAGCCTCCAAAATGCTGGGATTACAGGCGTGAGCCACCGTGCCCAAAGTTAATTTTTTTTAA 162  
 |||||  
 chr2:32340253 GTGATCCGCTGCCTCAGCCTCCAAAAGTACTGGGATTACAGGCGTGAGCCACCGTGCCCAAAGTTAAttttttttAAA 32340332

No known SNPs underlie any differences (dbSNP137 via UCSC Genome Browser).

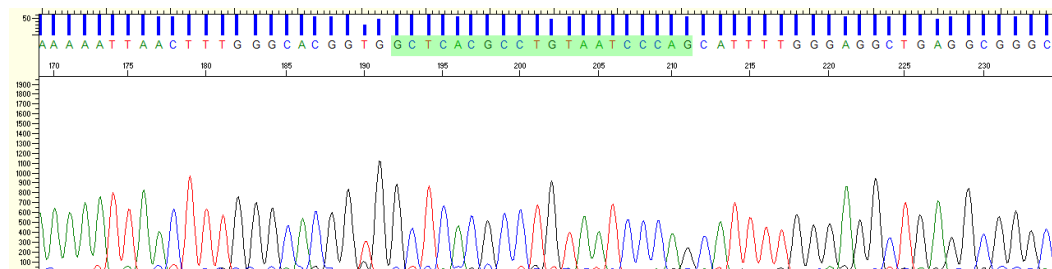**Figure S3, cont'd.**



**Ruhr 21**

Reverse complement sequence

chr2:32360273 **ACTGCAAGCTCCACCTCCTGGGTTACAGCCATTCTCTGCCTCAGCCTCCCGAGTAGCTGGGA**CTACAGGCGCCTGCCACCACGCCTGGCTAAT 32360366  
 |||||  
 Ruhr 21 283 **ACTGCAAGCTCCACCTCCTGGGTTACAGCCATTCTCTGCCTCAGCCTCCCGAGTAGCTGGGA**TTACAGGCATGCGCCACTACCCCAG-CTAAT 191  
 |||||  
 chr2:32381182 ACCACAACCTCCGCTCCAGGTTCAAGCA**ATTCTCTGCCTCAGCCTCCCGAGTAGCTGGGA**TTACAGGCATGCGCCACTACCCCAG-CTAAT 32381274

No known SNPs underlie any differences (dbSNP137 via UCSC Genome Browser).

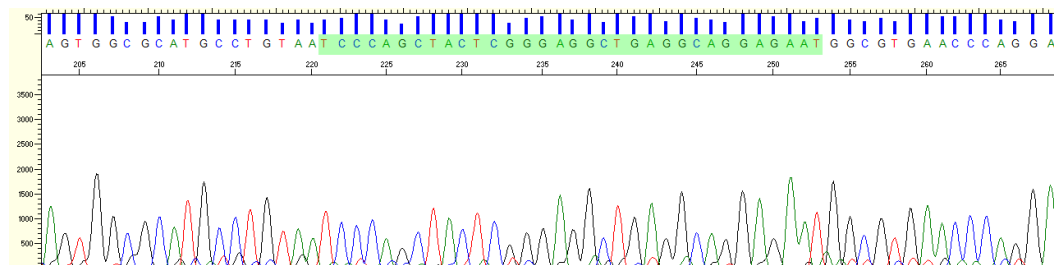**Ruhr 23**

Forward sequence

chr2:32372797 **TTCAGGCCATTCTCTGCCTCAGCCTCCCTAGTAGCTGGGA**CTACAGGCGCCCACCACCACGCCTGGCTAA 32372867  
 |||||  
 Ruhr 23 337 **TTCAGGCCATTCTCTGCCTCAGCCTCCCTAGTAGCTGGGA**TTACAGGCGCGTGCCACTACGCCCGGCTAA 407  
 |||||  
 chr2:32390371 TTCAAGCGATTCTCTGCCTCAGCCTCCAG**AGTAGCTGGGA**TTACAGGCGCGTGCCACTACGCCCGGCTAA 32390441

No known SNPs underlie any differences (dbSNP137 via UCSC Genome Browser).

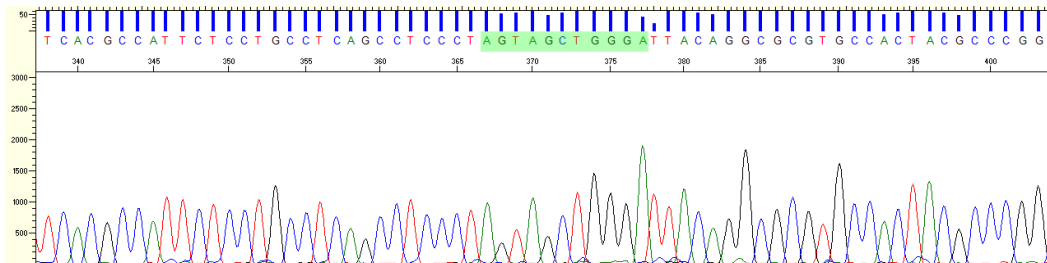**Ruhr 26**

Sequencing failed to identify the breakpoint sequence.

**Figure S3, cont'd.**



**Ruhr 28**

Reverse complement sequence

chr2:32288676 GAGGGGCCCGAGCCACCGACTGCAGGAGGA GAAGGGGTTGTGCTCCTGGCCGAGGAAGGAGAAA 32288739

Ruhr 28 508 GAGGGGCCCGAGCCACCGACTGCAGGAGGA GAAGTGGTATCTCGTTGTGATTTGATTTGCATG 445

chr2:32305164 TTTTAAAATAATAGTCATCCTAAAGGGTAT GAAGTGGTATCTCGTTGTGATTTGATTTGCATG 32305227

No known SNPs underlie any differences (dbSNP137 via UCSC Genome Browser).

SPAST transcription start site underlined.

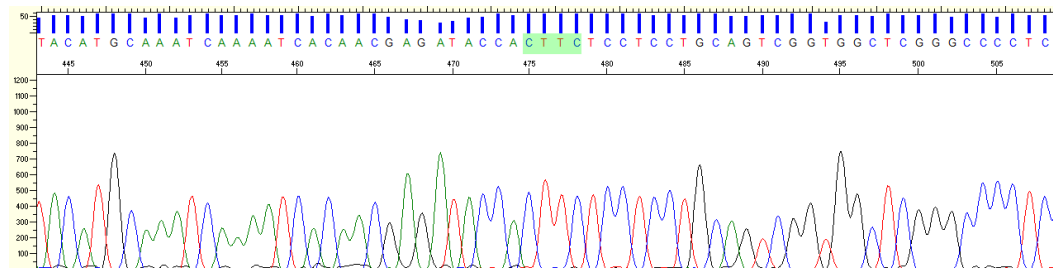**Ruhr 29**

Forward sequence

Chr2:32348551 AGTCCCAGTCAAACCCAGCCAGTTATTTTGTGGATACTGGCAAACCTAAAGTTTATATGAAAAGGCAAAGACCTAGAACAGCCA 32348635

Ruhr29 296 AGTCCCAGTCAAACCCAGCCAGTTATTTTGTGGATACTGGCACAATAGTCATCCTTCCCTTCTGATCTGCAGAGAGAGTTGT 380

Chr2:33632481 TATTTTAGGGTGTATACCTATGGGTGGAACACTTCATTTTATTCAATAGTCATCCTTCCCTTCTGATCTGCAGAGAGAGTTGT 33632565

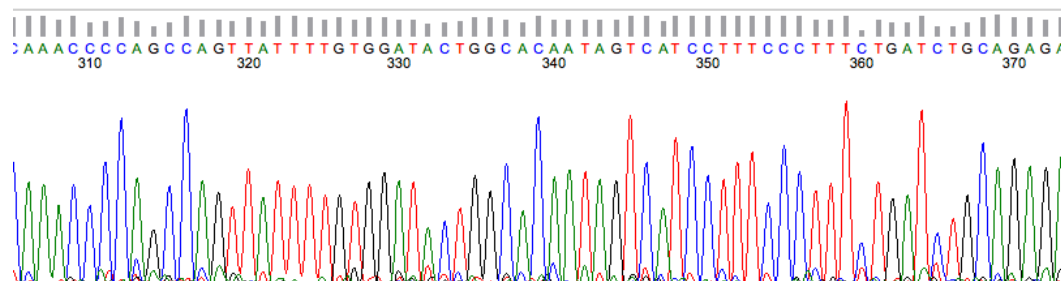**Figure S3, cont'd.**

**Ruhr 31**

Forward sequence

```
chr2:32350903 G C C C G G T T G G A G T G C A G T G G C G C A A T C T T G G C T C A A T A C A C G C T C C G C T C C G G G T T C A C G C C A T T T C C T G C C T C A G C C T C C T G A G T A G C T G G G A C G A 32351003
Ruhr 31 204 G C C C G G T T G G A G T G C A G T G G C G C A A T C T T G G C T C A A T A C A C G C T C C G C T C C G T G G G T T C A C G C C A T T C T C T G C C T C A G C C T C C C G A G T A G C T G G G A C T A 304
Chr2:32360238 G C C C G G C T G G A G T G C A G T G G T A C C A T C T C G G C T C A C T G C A A G C T C C A C C T C C T G G G T T C A C G C C A T T C T C T G C C T C A G C C T C C C G A G T A G C T G G G A C T A 32360338
```

No known SNPs underlie any differences (dbSNP137 via UCSC Genome Browser).

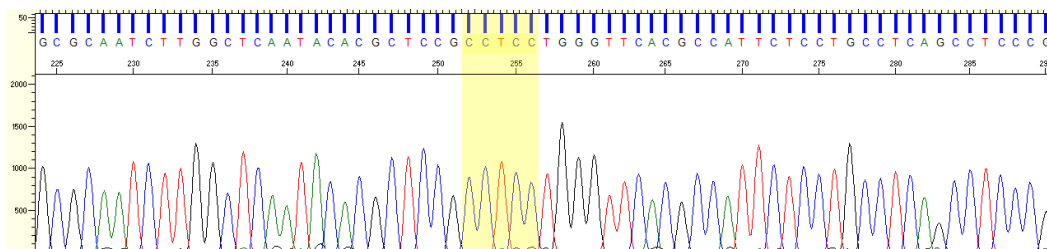**Ruhr 32**

Breakpoint PCR failed to yield a product.

**Park 1**

Forward sequence

```
Chr2:32338700 T C T C G G C T T A C T G C A A C C T C C G C C T C C T G A G T T C A A G T G A T T C T C C T G C C T C A G C C T C C G A A G T A G C 32338766
Park_1 741 T C T C G G C T T A C T G C A A C C T C C G C C T C C T G A G T T C A A G C G A T T C T C A T G C C T C A A C C T C C C G A G T A G C 807
Chr2:32350358 T C T C G G C T C A C T G A A A C C T C C G C C T C C A G G G T T C A A G C G A T T C T C A T G C C T C A A C C T C C C G A G T A G C 32350424
```

No known SNPs underlie any differences (dbSNP137 via UCSC Genome Browser).

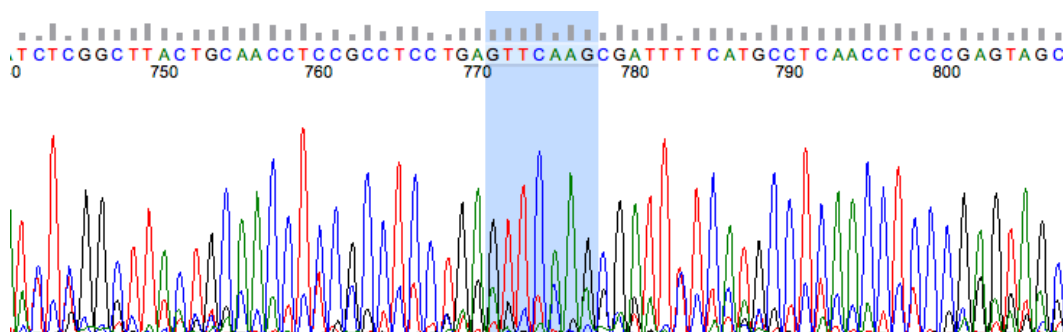**Figure S3, cont'd.**

**Park 2**

Forward sequence

```

Chr2:32339676 AATCACAATGGTTTTACTTTTTCCCTTGTCAGAAAGTGGAGCTGTTCCAAAAAGAAAAGACCCCTTAACACACACTA 32339751
Park_2      257 AATCACAATGGTTTTACTTTTTCCCTTGTCAGAAAGTGGAGTCCAGGAGTTCGACACCAGCCTGGGCAATGTAGTGA 312
Chr2:32347756 CCCAGCACTTTTCAGAGGCCAAGGCAGGAAGATGCTTGAGTCCAGGAGTTCGACACCAGCCTGGGCAATGTAGTGA 32347831
                                                    *rs12611678

```

At underlined bases marked with "\*", a known SNP exists that matches the patient sequence, potentially explaining the difference between the patient and reference genomes at that position. No other known SNPs underlie any differences (dbSNP137 via UCSC Genome Browser).

The first nucleotide of *SPAST* exon 5 is underlined in red.

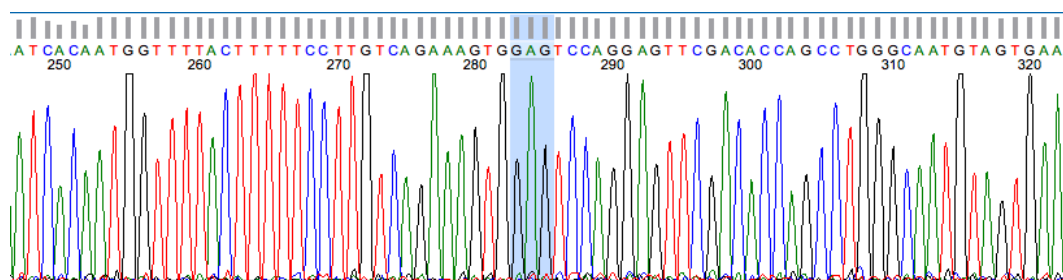**Park 3**

Forward sequence

```

Chr2:32351019 ACGCCCGCTAAATTTTTTTGTATTTTAGTAGAGACGGGTTTCATCGTGTTAGCCAGGATGGTCTCGATCTCCTGACCTCGTGAT 32351104
Park_3      315 ACGCCCGCTAAATTTTTTTGTATTTTAGTAGAGACGGGTTTCACCATGTTGGCCAGGATGGTCTTGAAC~CCGACCTCAGGTG 400
Chr2:32359920 ACGCCCGCTAA--TTTTTGTAGTTTAGTAGACACAGGGTTTCACCATGTTGGCCAGGCTGGTCTTGAAC~CCGACCTCAGGTG 32360003

```

It is unclear whether the underlined base represents complexity or a novel SNP.

No known SNPs underlie any differences (dbSNP137 via UCSC Genome Browser).

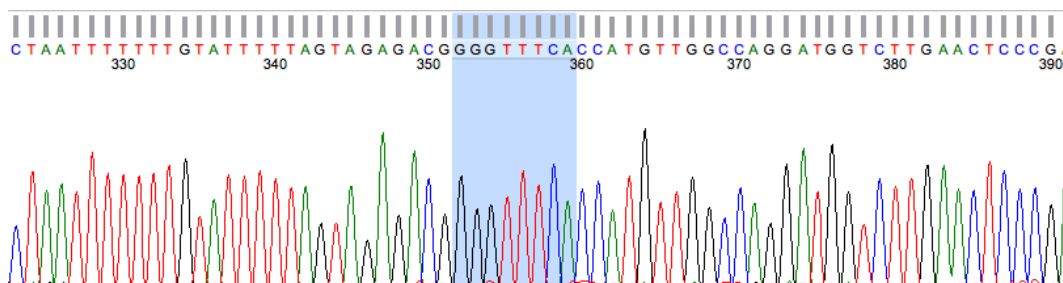

**Figure S3, cont'd.**



**Park 4**

Forward sequence

Chr2:32321521 **ATTGGAGCAGTTTCACAGATGCTGTTTACTGTTATACTG**TATGTGTCTATGACTCCTCCTCCAAGAAAAAAAAAAT 32321596Park\_4 520 **ATTGGAGCAGTTTCACAGATGCTGTTTACTGTTATACTG**CACTCCAGCCTGGGCAGAAAGAGCAAACTCCATCTC 595Chr2:32422054 GGGAGACAGAGGTTGAGTGAGCCGAGATGGCACCC**ACTG**CACTCCAGCCTGGGCAGAAAGAGCAAACTCCATCTC 32422129

No known SNPs underlie any differences (dbSNP137 via UCSC Genome Browser).

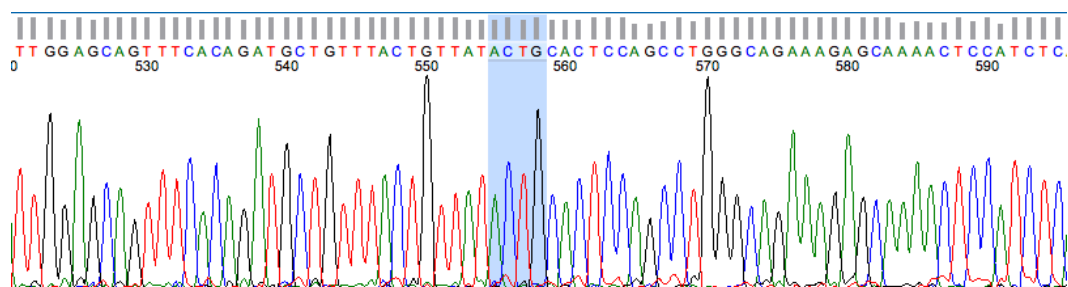**Figure S3, cont'd.**

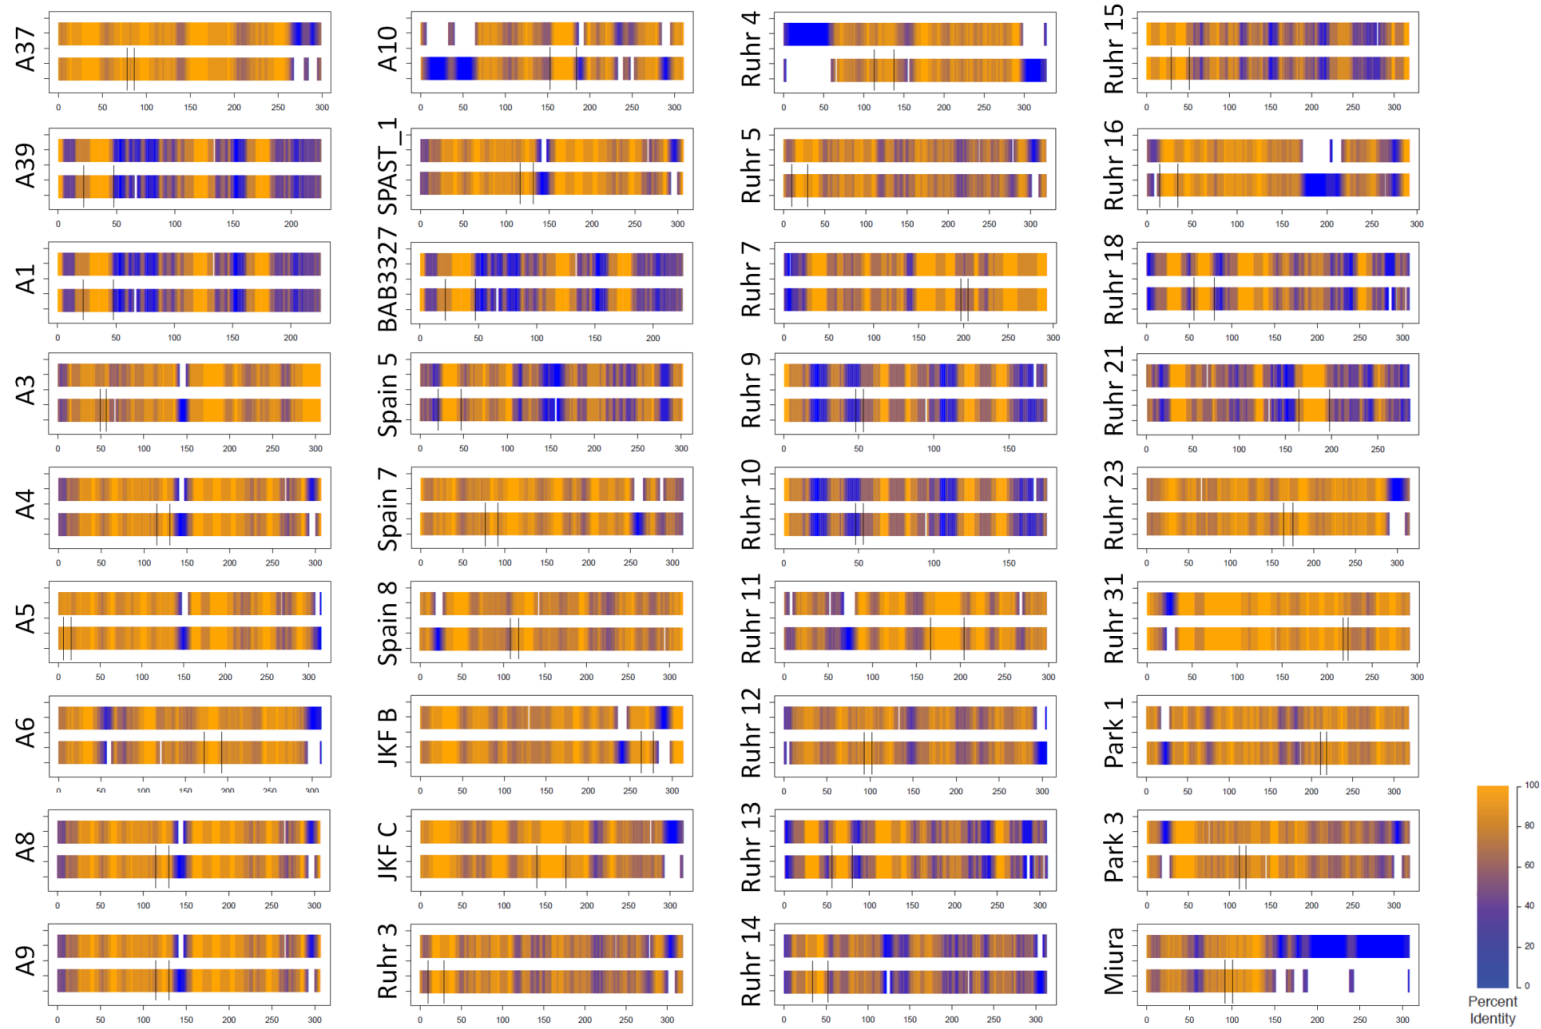

**Figure S4. Breakpoint *Alu* pairs aligned for each non-complex, *Alu*-mediated CNV.** The telomeric *Alu* is on top in each pairing.

Heat map shading depicts a 10 bp sliding window of identity. Microhomology/crossover spots are flanked by black lines; these occupy various positions within the *Alu* pairs.

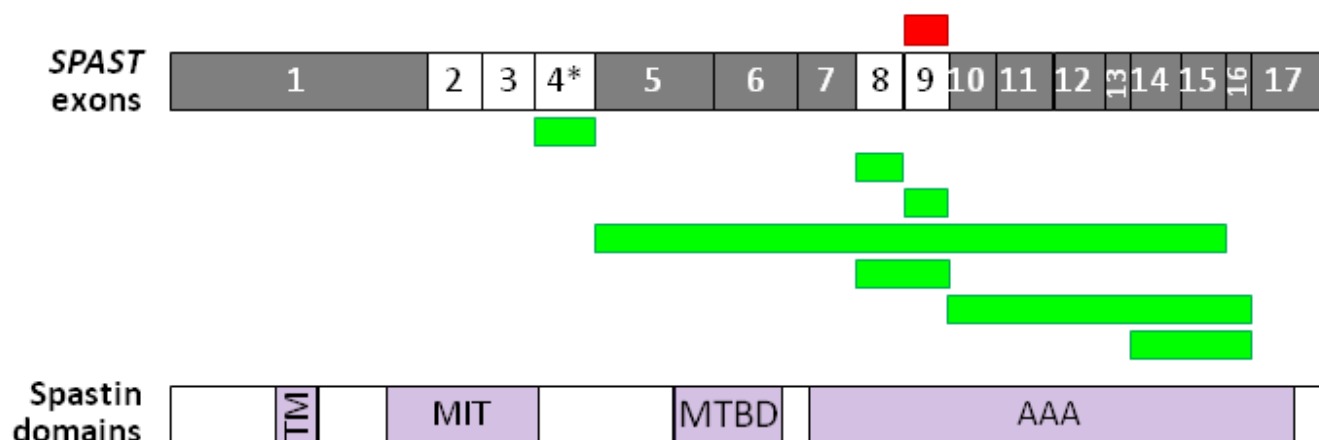

**Figure S5. Pathogenic in-frame deletions and duplication of *SPAST* exons.** Deletions (green) of exons 4, 8, and 9 of *SPAST*, predicted to be in-frame, in SPG4 patients suggests that these exons are indispensable. A pathogenic, predicted in-frame duplication (red) of exon 9 (24 amino acids) reinforces the sensitivity to mutation of spastin's AAA (ATPase associated with various cellular activities) domain.<sup>1</sup> Reported, predicted in-frame multi-exon deletions (green) are also shown. Shaded *SPAST* exons are predicted to alter reading frame when deleted or duplicated whereas unshaded exons are multiples of 3 nucleotides and thus are predicted to preserve reading frame. Data are drawn from all published *SPAST* CNVs whether breakpoint sequences were assessed or not.<sup>2-6</sup> Domain map from <sup>1</sup>. TM, transmembrane; MIT (microtubule interacting and trafficking); MTBD (microtubule binding domain); \*, alternatively spliced exon.

**Ruhr 9, Ruhr 10** - Haplotype in 1000 Genomes: 852/1984 (42.9%)

| SNP                   | rs13017189   | rs660393     | rs572946    | rs13000753   | rs34460762   | rs13024004   | rs652978     | rs201350097  | rs62142107  | rs6758024    | rs10084410  | rs78871913  | rs10084280  | rs17011801   | rs113080319 |
|-----------------------|--------------|--------------|-------------|--------------|--------------|--------------|--------------|--------------|-------------|--------------|-------------|-------------|-------------|--------------|-------------|
| Position (chr2)       | 32281280     | 32281509     | 32281510    | 32282297     | 32282340     | 32282362     | 32286411     | 32286411     | 32294435    | 32294486     | 32296099    | 32296134    | 32297984    | 32298072     | 32298273    |
| Ref/minor allele; MAF | A/G; 47.523% | C/A; 42.811% | T/G; 2.657% | T/C; 45.263% | G/C; 10.073% | A/G; 45.359% | A/T; 47.965% | -/T; 42.883% | T/A; 5.637% | G/C; 44.538% | A/G; 3.972% | G/C; 1.218% | G/A; 5.680% | A/T; 32.088% | T/A; 1.330% |
| Ruhr 9                | Wt           | Wt           | Wt          | Wt           | Wt           | Wt           | Wt           | Wt           | Wt          | Wt           | Wt          | Wt          | Wt          | Wt           | Wt          |
| Ruhr 10               | Wt           | Wt           | Wt          | Wt           | Wt           | Wt           | Wt           | Wt           | Wt          | Wt           | Wt          | Wt          | Wt          | Wt           | Wt          |

**Ruhr 3, Ruhr 5** - Haplotype in 1000 Genomes: 1049/1984 (52.9%)

| SNP                   | rs115440025 | rs112067196 | rs3769603    | rs6725068   | rs3830711       |
|-----------------------|-------------|-------------|--------------|-------------|-----------------|
| Position (chr2)       | 32360726    | 32360852    | 32360887     | 32360930    | 32362084        |
| Ref/minor allele; MAF | T/C; 1.131% | A/G; 1.330% | C/A; 43.230% | C/T; 3.715% | -/ATAT; 36.239% |
| Ruhr 3                | Wt          | Wt          | Wt           | Wt          | Wt              |
| Ruhr 5                | Wt          | Wt          | Wt           | Wt          | Wt              |

**Ruhr 13, Ruhr 18** - Haplotype in 1000 Genomes: 102/1984 (5.1%)

| dbSNP 138             | rs12617289   | rs12617290   | rs7574000    | rs116766118 | rs13022197   | rs60386495   | rs150295812 | rs11681731   | rs6716179    | rs72796871  | rs72863940   | rs75497994  | rs139405008 | rs12465351   | rs7581432    | rs7588883    |
|-----------------------|--------------|--------------|--------------|-------------|--------------|--------------|-------------|--------------|--------------|-------------|--------------|-------------|-------------|--------------|--------------|--------------|
| Position (chr2)       | 32341399     | 32341408     | 32342888     | 32342989    | 32343167     | 32345123     | 32345168    | 32345325     | 32393076     | 32393157    | 32394674     | 32394704    | 32394747    | 32394905     | 32395315     | 32397267     |
| Ref/minor allele; MAF | A/G; 46.481% | A/G; 45.480% | A/C; 30.769% | T/G; 1.436% | T/A; 44.401% | C/T; 10.046% | C/G; 1.377% | A/T; 46.460% | C/A; 50.425% | G/A; 4.003% | C/T; 45.163% | C/T; 5.440% | C/T; 1.148% | G/C; 50.601% | A/G; 50.397% | A/G; 52.168% |
| Ruhr 13               | G            | G            | Wt           | Wt          | A            | T            | Wt          | T            | A            | Wt          | T            | T           | Wt          | C            | G            | G            |
| Ruhr 18               | G            | G            | Wt           | Wt          | A            | T            | Wt          | T            | A            | Wt          | T            | T           | Wt          | C            | G            | G            |

**A1, A39, BAB 3327** - Haplotype in 1000 Genomes: 709/1984 (35.7%)

| dbSNP 138             | rs7572964    | rs11694630   | rs148193979 | rs11678119   | rs72796867  | rs2280973    | rs13425665  | rs72097810     | rs4952209    | rs10208246   | rs13429391  |
|-----------------------|--------------|--------------|-------------|--------------|-------------|--------------|-------------|----------------|--------------|--------------|-------------|
| Position (chr2)       | 32372096     | 32376201     | 32376274    | 32376303     | 32376367    | 32378604     | 32385711    | 32385896       | 32386033     | 32386659     | 32386803    |
| Ref/minor allele; MAF | A/T; 41.900% | G/A; 42.524% | A/C; 4.499% | T/C; 44.248% | T/C; 1.131% | C/A; 45.317% | C/A; 1.690% | AAG/-; 49.725% | G/C; 51.645% | G/A; 41.323% | C/T; 8.265% |
| A1                    | T            | A            | Wt          | C            | Wt          | Wt           | Wt          | -              | C            | Wt           | Wt          |
| A39                   | T            | A            | Wt          | C            | Wt          | Wt           | Wt          | -              | C            | Wt           | Wt          |
| BAB 3327              | T            | A            | Wt          | C            | Wt          | Wt           | Wt          | -              | C            | Wt           | Wt          |

**A4, A8, A9, SPAST 1** - Haplotype in 1000 Genomes: 895/1984 (45.1%)

| dbSNP 138             | rs2886393    | rs7572964    | rs11694630   | rs148193979 | rs11678119   | rs72796867  | rs12712326  | rs111261438 | rs13425665  | rs72097810     |
|-----------------------|--------------|--------------|--------------|-------------|--------------|-------------|-------------|-------------|-------------|----------------|
| Position (chr2)       | 32371562     | 32372096     | 32376201     | 32376274    | 32376303     | 32376367    | 32384194    | 32384269    | 32385711    | 32385898       |
| Ref/minor allele; MAF | G/C; 43.046% | A/T; 41.900% | G/A; 42.524% | A/C; 4.499% | T/C; 44.248% | T/C; 1.131% | C/G; 9.817% | G/A; 2.570% | C/A; 1.690% | AAG/-; 49.725% |
| A4                    | Wt           | Wt           | Wt           | Wt          | Wt           | Wt          | Wt          | Wt          | Wt          | Wt             |
| A8                    | Wt           | Wt           | Wt           | Wt          | Wt           | Wt          | Wt          | Wt          | Wt          | Wt             |
| A9                    | Wt           | Wt           | Wt           | Wt          | Wt           | Wt          | Wt          | Wt          | Wt          | Wt             |
| SPAST_1               | *            | *            | *            | *           | *            | *           | *           | *           | *           | *              |

**Figure S6. SNPs flanking identical CNVs found in multiple individuals.** To identify whether identical CNVs occurred on the same haplotype (i.e. no specific evidence for recurrent CNV formation) or different haplotype (i.e. suggests recurrence), common SNPs

(dbSNP 138 allele frequency  $\geq 1\%$ ) flanking the CNVs were genotyped. No flanking SNPs differ among individuals sharing the same CNV, thus failing to provide evidence for recurrence. Note that some SNPs differ between individuals A1/A39/BAB3327 and individuals A4/A8/A9, indicating that *SPAST* CNVs have occurred on different haplotypes, a positive control of our method. SNPs are listed in genomic order. The empty space in each box indicates the location of the CNV. Reference alleles are listed as “Wt” and shaded in lavender. Non-reference alleles are shaded in blue. MAF, minor allele frequency (dbSNP 138). \**SPAST* 1 SNPs could not be analyzed owing to failure at the PCR stage. PCR and raw sequencing data are not shown.

## Supplemental Tables

| Breakpoint PCR Primers <sup>a</sup> |                                     |
|-------------------------------------|-------------------------------------|
| Primer name                         | Sequence (5' to 3')                 |
| A1 F1                               | TTTTTCTATTGCCTGGACTCTGTGAACCTATC    |
| A1 R2                               | CTATCCACCATGTGAATAACTGCCTCAATCT     |
| A2 F1                               | GGTGAAGAATATGTCTGCCAGTGAGGTATAGT    |
| A2 R1                               | GGTCTCGTGAAAATTATATTCTGGTAGGGAAG    |
| A3 F1                               | TATTCTTCTACACTTTGGCCTTTAGGAAGAGG    |
| A3 R1                               | CAAATGAATGAGTGAGTGAGTGTGGATGTGT     |
| A4 F1, A8 F1, A9 F1                 | TATTCTTCTACACTTTGGCCTTTAGGAAGAGG    |
| A4 R1, A8 R1, A9 R1                 | GTTGAGCTGGAACCACATAGTCCCTTTAATATG   |
| A5 F1                               | TATTCTTCTACACTTTGGCCTTTAGGAAGAGG    |
| A5 R1                               | GAATAGTTCAGAGGAGAGTGTTCAGAGA        |
| A6 F1                               | GTAGATCATTGTACTTGGTTTTGCCCTTCAAC    |
| A6 R1                               | TTATTACACCAAAGAGCAGTATCTTCCAGGAC    |
| A10 F1                              | TGATGCTCTCAGGTATGCACTCAGATTATTAG    |
| A10 R1                              | GACTACTCAAGATACCTATCCCTTCCCTACA     |
| BAB 3200 F1                         | AGCAATGCCTAAGAACTCCTATAACTCCTGT     |
| BAB 3200 R1                         | AAACCAACTCCTCGGTGGTAAAAATGAAAG      |
| BAB 3327 F1                         | TTTTTCTATTGCCTGGACTCTGTGAACCTATC    |
| BAB 3327 R2                         | CTATCCACCATGTGAATAACTGCCTCAATCT     |
| BAB 5112 F1                         | CTCTGTTGCATAGAGAAGATGCAACCAAGTTTT   |
| BAB 5112 R1                         | GTTTGTGTACTGCCTGGCTGCTATCTATTACT    |
| SPAST 1 F1                          | ATATAGTGCTTATGGGGTTTTCTTTGGTGGGG    |
| SPAST 1 R1                          | GCTGGAACCACATAGTCCCTTTAATATGATTAGCC |
| SPAST 3 F1                          | TTATTGGTGGAGGACTTCTGTTTAGGGGCTTCA   |
| SPAST 3 R1                          | AATGGCTATCACAGGTTTTTCAGTCTTCCAAGA   |
| Spain 1 F1                          | GACTCTCCATTTCTTAGGTTCTCTGACATCTG    |
| Spain 1 R1, Spain 7 R1              | TTTGCTCACAGAGTTATGACCATTCTGCATAC    |
| Spain 2 F1                          | CAGAGTACTTGTAAATGGGTGCAACTAATAGCC   |
| Spain 2 R1                          | TCCTTTTCTCTATCCAACTCTCAGCACAT       |
| Spain 3 F1                          | CCACACTTGTAAATCTCATACAGCAGTTCTCAT   |
| Spain 3 R1                          | GTTTACCATCTAATCACAGTGAGCATCTGAAC    |
| Spain 4 F1                          | CTAACTGAGGCTTGTTCCTTAGTGGACAGC      |
| Spain 4 R1                          | CCAGAGTCTTCCCTTCAAAGACACCTATTAT     |
| Spain 5 R1                          | CAGAGCTGTACAAATTAAGTGGCCTCCAAT      |
| Spain 6 F1, Spain 8 F1              | GGTGAACATATGAGAGAATTAATCAGGGGCTAT   |
| Spain 6 R1                          | TATACGCAGGTTAAGCTTGTCTTCAGCAAATC    |
| Spain 7 F1                          | CAGCGAGAGAACTTGATTTTATCAGTACACC     |
| Spain 8 R1                          | GCTGCCCATAGCTTTAAAGGAAACACATAATC    |
| Spain 9 F1                          | TTAACACACACTAGTAATTCAGTCCCTCGTTC    |
| Spain 9 R1                          | TGAAGGATGAATATCTAGAAAGTCCAAGAGG     |
| JKF B F1                            | ATTACCAGTAACACCTCCCGTAGTGAAATAGG    |
| JKF B R1                            | TATCTGTGTTAACAGTTCACGTGCCCTCAAC     |
| JKF C F1                            | CACACCGTCTTCAAATGTAAAGTTTGGTC       |
| JKF C R1                            | GGAAACAGAGCACTCACGTATTTTGAAGTT      |
| Ruhr 3 F1, Ruhr 5 F1                | TTCATTCATAGTGTCTGTCTCTACTGCCAACT    |
| Ruhr 3 R1, Ruhr 5 R1                | AGTTCTCCCAAAGCTTTCTCAGGATAGAT       |
| Ruhr 4 F1, Spain 5 F1               | GCGCTTCAGGGGCTAACAAATACTTATTTTC     |
| Ruhr 4 R1                           | CAGTGATATCCCCCTTTGCTTTACTATATTCC    |
| Ruhr 6 F1                           | TCTTACAGTATAGTCACTGGCAGTTTCCCTCT    |
| Ruhr 6 R1                           | GCTGTTCCACTAAGAAACAAGACCTCAGTTAG    |
| Ruhr 7 F1                           | CAAGGAAGAATATTACTGGTCCCTTTTGTGAG    |

Table S2. Primer sequences.

|                                     |                                   |
|-------------------------------------|-----------------------------------|
| Ruhr 7 R1, Ruhr 21 R1               | GTTGAGCTGGAACCACATAGTCCTTTAATATG  |
| Ruhr 9 F1, Ruhr 10 F1, Ruhr 28 F1   | AAGAGACTCGTTCCAGTTACTTTCTATTTCG   |
| Ruhr 9 R1, Ruhr 10 R1               | GATACTGAAAGATTTAAGTCACCAGCCTGAGA  |
| Ruhr 11 F1                          | AATAACCATCCTAATGGGCTTGATATGGTC    |
| Ruhr 11 R1                          | AGTGAAATAACTGTGACCCAGAAGTGAGTCTT  |
| Ruhr 12 F1                          | CAAGACTGTTGTTTAAAATGTGCTCCCCTA    |
| Ruhr 12 R1                          | CCTTAATTTCTCCTTTTATCCTACCTCCCAAC  |
| Ruhr 13 F1, Ruhr 18 F1              | CCTCTTGGACCTTCTAGATATTCATCCTTCA   |
| Ruhr 13 R1                          | AGGGCTGTGAGTTAATGAAGGTGATAATCTG   |
| Ruhr 14 F1                          | GGTCCTATCCGAGGTAGGTATACAAGAGCTTA  |
| Ruhr 14 R1                          | CCAGAGTCTTCTCTTCAAAGACACCTATTAT   |
| Ruhr 15 F1                          | TTCAATTCATAGTGTCTGTCTCTACTGCCAACT |
| Ruhr 15 R1                          | CTATGAAACAAGAGCCCAAGTGAATGTAAGAG  |
| Ruhr 16 F1                          | GGCCACTCTAATTTGCTGACTGACTTAACAT   |
| Ruhr 16 R1                          | CCCTTGTAGAAATCATGACAAAACCTCTAGG   |
| Ruhr 17 R1                          | GTTTGGCATTCCAATCACCTGTAGTTAAGAC   |
| Ruhr 18 R1                          | CCAGATCTGTCTAACCAGCTTATTATCAT     |
| Ruhr 21 F1                          | ATCTATCCTGAGAAAGCTTTTGGGAGGAAT    |
| Ruhr 23 F1, Ruhr 27 F1              | GTTGAACATTGTTTTTGGGCAGTATGCAAG    |
| Ruhr 23 R1                          | GGACCAATAAGATAAACCGAATCAGCTACAG   |
| Ruhr 26 F1                          | GTTATGTGCGTCCTTTTGTGTTTCCCTATC    |
| Ruhr 26 R1                          | TATCTGTGTTAACAGTTCAGTGTCCCTCAAC   |
| Ruhr 27 R1                          | GAATAGTTCCAGAAGGAGAGTTGTTCAAGAGA  |
| Ruhr 28 R2                          | CTTTAACATTAGCTCCCAACAGTCCCTAGTTT  |
| Ruhr 29 F2                          | CATCATAACCACACCTTCTACTCCTGTCTC    |
| Ruhr 29 R2                          | CAAATATGATGTAAGCCCCAGTCAGTCTTC    |
| Ruhr 31 F1, Ruhr 17 F1              | TAAAGTGTAGGTGAGAtgttttcagctctggag |
| Ruhr 31 R1                          | CACCAAAGTAAATGAGTCATGAGGTCTGTGATA |
| Ruhr 32 F1                          | AGTGCTGATGTTATAATCCAAGCCCAATG     |
| Ruhr 32 R1                          | GGGTCAATGGACTTCTTGTGTTTACATAACAG  |
| Ruhr 32 F2                          | AAACTAGGGACTGTTGGGAGCTAATGTTAAAG  |
| Ruhr 32 R2                          | GATTAAGGCATACTATCTCCAGAGGCTTCATT  |
| Park 1 F1, Park 2 F1                | TTGGCCACTCTAATTTGCTGACTGACTTAACA  |
| Park 1 R1, Park 2 R1                | TTTTTCAGTAGCATCTTCCCAAACAGAGCTGC  |
| Park 3 F1                           | CCTTAGCTCCATCATACCACACACCTTCTACT  |
| Park 3 R1                           | ACTTGCGCTATTAAGAACACCGTGAAAAGTCA  |
| Park 4 F1                           | TATCTGGCACCACATCTCTGAAAAGCTCCAAT  |
| Park 4 R1                           | CTCTTTTCTGTTTCACTCATCAGGTCAGCAGT  |
| Long range Ctrl F                   | CTAGAAGGAACCTAGATAGGTCAAGCCTCTGC  |
| Long range Ctrl R                   | AGAGGAGCTTCAGATGCTGGAAAGCTAGAG    |
| <b>cDNA PCR primers</b>             |                                   |
| <b>Primer name</b>                  | <b>Sequence (5' to 3')</b>        |
| SPAST exon 16 F1                    | CTAAAACCAGAACAGGTGAAGAA           |
| SLC30A6 exon 2 R1                   | TCAGCTGCTACAAGTCTAAATTC           |
| SPAST exon 12 F1                    | CAGTCTGCTGGAGATGACAGA             |
| SLC30A6 exon 7 R1                   | GGCAAATACAGCCAGGACTT              |
| External pos ctrl (KDM4C exon 18) F | CTGCATCCAGTGTTCCTACG              |
| External pos ctrl (KDM4C exon 19) R | CCTCAGGAAATGTGTCTCTGC             |
| <b>Haplotyping PCR primers</b>      |                                   |
| <b>Primer name</b>                  | <b>Sequence (5' to 3')</b>        |
| Ruhr 9-10 Haplo F1                  | TCTAGAATCTCTCGAATGGAAGTCTGAAGAG   |
| Ruhr 9-10 R1                        | GATACTGAAAGATTTAAGTCACCAGCCTGAGA  |
| Ruhr 9-10 Haplo R1                  | CTGTTTAAATACCTCTCGTTCTTCCCATATC   |
| Ruhr 9-10 F1                        | AAGAGACTCGTTTCCAGTTACTTTCTATTTCG  |
| Ruhr 3-5 Haplo F1                   | GCAGTACTGGCGGGGAATAATTAAGTAAAA    |
| Ruhr 3-5 R1                         | AGTTCCCTCCCAAAGCTTCTCAGGATAGAT    |
| Ruhr 3-5 Haplo R1                   | GATAGGGAAAACAAAAGGACGCCAACATAACAC |
| Ruhr 3-5 F1                         | TTCAATTCATAGTGTCTGTCTCTACTGCCAACT |

Table S2, cont'd.

|                                       |                                   |
|---------------------------------------|-----------------------------------|
| Ruhr 13-18 Haplo F1                   | CCTACCACTCATAAGGTATTCTGGGACAGTAA  |
| Ruhr 13 R1                            | AGGGCTGTGAGTTAATGAAGGTGTATAATCTG  |
| Ruhr 13-18 Haplo R1                   | GAATAGTTCCAGAAGGAGAGTTGTTCAAGAGA  |
| Ruhr 13 F1                            | CCTCTTGGACCTTCTAGATATTCATCCTTCA   |
| A1-A39-BAB3327 Haplo F1               | GCTGCTGGAGCTTAAATCTTGTTTCAGTTAG   |
| A1-A39-BAB3327 R1 (A1 R2)             | CTATCCACCATGTGAATAACTGCCTCAATCT   |
| A1-A39-BAB3327 Haplo R1               | GGGACCAATAAGATAAACCAGATCAGCTAC    |
| A1-A39-BAB3321 F1 (A1 F1)             | TTTTTCTATTGCTGGACTCTGTGAACCTATC   |
| A4-8-9 Haplo F1                       | GCTGGAGCTTAAATCTTGTTTCAGTTAGTGGAT |
| A4-8-9 R1                             | GTTGAGCTGGAACCACATAGTCTTTAATATG   |
| A4-8-9 Haplo R1                       | TTCAGCTCTTCCATCCCAGTGTTCATCTTAC   |
| A4-8-9 F1                             | TATCTTCTACACTTTGGCCTTTAGGAAGAGG   |
| <b>Haplotyping sequencing primers</b> |                                   |
| <b>Primer name</b>                    | <b>Sequence (5' to 3')</b>        |
| Ruhr 9-10 Haplo Seq L F1              | TGTCCTGAAAGTTCTTACAAGCT           |
| Ruhr 9-10 Haplo Seq L R1              | AGGAGAGAACAGCAGTGACA              |
| Ruhr 9-10 Haplo Seq L R2              | TGACCTACTCCCTGTTTCCC              |
| Ruhr 9-10 Haplo Seq R F1              | CAGAAGATGAGGATGGAGGGT             |
| Ruhr 9-10 Haplo Seq R R1              | TGACCCCTTTAGCCCTTTAAACT           |
| Ruhr 9-10 Haplo Seq R R2              | AGGGAATGGCAGTGCATGAT              |
| Ruhr 3-5 Haplo Seq L F1               | ATGTTTGTGATGAATGGATTGCGT          |
| Ruhr 3-5 Haplo Seq L R1               | GCAACCGTTTTTAATCTCCCC             |
| Ruhr 3-5 Haplo Seq L R2               | ACGCAATCCATTCATCAACAT             |
| Ruhr 3-5 Haplo Seq R F1               | GAAGAGAAGGGGAGCAGGAT              |
| Ruhr 3-5 Haplo Seq R R1               | TGTTGAAAATCTAGCACACAGGA           |
| Ruhr 3-5 Haplo Seq R F2               | CTGGGAATGTCTCAAGGGGT              |
| Ruhr 13-18 Haplo L F1                 | CTTCCTTCTCTGAGGCCTGA              |
| Ruhr 13-18 Haplo L R1                 | ATAATGCACCCACCACACG               |
| Ruhr 13-18 Haplo L R2                 | AGTGGGAGGACAGGAGTAGA              |
| Ruhr 13-18 Haplo R R1                 | TCACTGGGAGAAAAATATAAGCCA          |
| Ruhr 13-18 Haplo R F1                 | GGCCACCAATGTAAACCTTCT             |
| Ruhr 13-18 Haplo R F2                 | TGAAGGGAGTTGAAGATAAAGGG           |
| A1-39 BAB3327 Haplo L R1              | GCAGTTGAAATTTGTTGAAGGGC           |
| A1-39 BAB3327 Haplo L R2              | CTTGTGTTTACGTCTCATCCCA            |
| A1-39 BAB3327 Haplo L R3              | TAGGTTTACAGAGTCCAGGC              |
| A1-39 BAB3327 Haplo R R1              | ACAGTTCAGGAAGGAGGAAGG             |
| A1-39 BAB3327 Haplo R R2              | TACCATCTCTGTGACACCC               |
| A 4-8-9 Haplo L R1                    | GCAGTTGAAATTTGTTGAAGGGC           |
| A 4-8-9 Haplo L R2                    | CTTGTGTTTACGTCTCATCCCA            |
| A 4-8-9 Haplo L F1                    | GCTGGAGCTTAAATCTTGTTTCAGTTAGTGGAT |
| A 4-8-9 Haplo R R1                    | TTCAGCTCTTCCATCCCAGTGTTCATCTTAC   |
| A 4-8-9 Haplo R F1                    | CAGATGCACAAGTGACCTCT              |
| A 4-8-9 Haplo R R2                    | AGAGGTCACTTGTGCATCTG              |

<sup>a</sup>Primers used exclusively for breakpoint sequencing are available upon request.

**Table S2, cont'd.**



| STR Marker                  | AMEL | CSF1PO | D13S317 | D16S539 | D18S51 | D19S433 | D21S11  | D2S1338 | D3S1358 | D5S818 | D7S820 | D8S1179 | FGA     | TH01    | TPOX | vWA   |
|-----------------------------|------|--------|---------|---------|--------|---------|---------|---------|---------|--------|--------|---------|---------|---------|------|-------|
| Dye                         | R    | B      | G       | G       | Y      | Y       | B       | G       | G       | R      | B      | B       | R       | G       | Y    | Y     |
| <b>Ruhr 9</b>               | X/Y  | 11/12  | 11/11   | 9/14    | 14/18  | 13/14.2 | 28/30   | 20/22   | 18/18   | 11/12  | 8/10   | 12/13   | 18/24   | 9.3/9.3 | 8/8  | 15/16 |
| <b>Ruhr 10</b>              | X/Y  | 10/10  | 11/12   | 10/13   | 13/18  | 10/14   | 30/30.2 | 17/19   | 15/16   | 11/13  | 8/11   | 12/17   | 19/22   | 7/8     | 8/8  | 16/16 |
| <b>Ruhr 3</b>               | X/Y  | 12/12  | 8/8     | 12/13   | 11/13  | 13/14   | 29/32   | 23/24   | 16/19   | 11/13  | 10/12  | 10/14   | 21/21   | 6/9.3   | 8/8  | 17/19 |
| <b>Ruhr 5</b>               | X/Y  | 10/11  | 12/12   | 12/13   | 14/19  | 14/15   | 29/31   | 23/24   | 15/16   | 12/13  | 11/12  | 11/13   | 21/23   | 7/7     | 8/8  | 16/18 |
| <b>Ruhr 13</b>              | X/Y  | 10/10  | 10/13   | 11/13   | 11/20  | 12/14   | 28/30   | 17/19   | 15/16   | 13/13  | 10/11  | 10/11   | 24/25   | 6/9     | 8/12 | 17/17 |
| <b>Ruhr 18</b>              | X/Y  | 9/10   | 11/13   | 9/9     | 13/17  | 14/14.2 | 28/29   | 17/23   | 14/17   | 11/14  | 8/11   | 9/14    | 22/22   | 9/9.3   | 8/11 | 15/15 |
| <b>A1<sup>a</sup></b>       | X/Y  | 11/11  | 9/12    | 11/14   | 13/15  | 14/16   | 29/32   | 19/20   | 15/16   | 11/12  | 10/12  | 10/10   | 21/21   | 9.3/9.3 | 8/8  | 14/17 |
| <b>A39</b>                  | X/X  | 10/11  | 11/12   | 11/12   | 13/16  | 15/16   | 28/31.2 | 20/25   | 15/16   | 12/12  | 8/12   | 10/13   | 22/24   | 9/9.3   | 9/11 | 16/17 |
| <b>BAB 3327<sup>a</sup></b> | X/X  | 10/11  | 11/12   | 9/11    | 13/18  | 14/16   | 30/32   | 19/19   | 15/16   | 11/12  | 10/12  | 10/13   | 20/21   | 7/9.3   | 8/9  | 14/17 |
| <b>A4</b>                   | X/X  | 12/12  | 8/12    | 11/12   | 13/16  | 14/14   | 30/30.2 | 20/20   | 15/17   | 12/12  | 10/11  | 11/13   | 20/24   | 6/9     | 8/9  | 17/17 |
| <b>A8</b>                   | X/X  | 9/11   | 10/12   | 10/13   | 12/12  | 14/15   | 27/30   | 19/25   | 14/18   | 12/12  | 10/13  | 12/16   | 21/21   | 7/9     | 8/8  | 17/17 |
| <b>A9</b>                   | X/X  | 9/10   | 9/11    | 9/11    | 16/17  | 14/15.2 | 28/30   | 20/26   | 16/17   | 11/12  | 7/9    | 12/13   | 22.2/25 | 6/6     | 8/11 | 15/18 |
| <b>SPAST 1</b>              | X/X  | 11/12  | 8/12    | 11/13   | 13/17  | 13/14   | 29/31.2 | 17/23   | 16/19   | 10/12  | 10/11  | 10/13   | 19/21   | 6/8     | 8/8  | 14/18 |

<sup>a</sup> STR alleles consistent with a parent-child pair.

STR allele sizes are separated by a “/”. If only a single STR allele was present, it is listed once on either side of the “/”. Raw electrophoretic data available upon request.

**Table S3. STR alleles indicate that subjects with identical CNVs are unique individuals.**

## References

1. Shoukier, M., Neesen, J., Sauter, S.M., Argyriou, L., Doerwald, N., Pantakani, D.V.K., and Mannan, A.U. (2009). Expansion of mutation spectrum, determination of mutation cluster regions and predictive structural classification of *SPAST* mutations in hereditary spastic paraplegia. *Eur J Hum Genet* 17, 187-194.
2. Boone, P.M., Liu, P., Zhang, F., Carvalho, C.M.B., Towne, C.F., Batish, S.D., and Lupski, J.R. (2011). *Alu*-specific microhomology-mediated deletion of the final exon of *SPAST* in three unrelated subjects with hereditary spastic paraplegia. *Genet Med* 13, 582-592.
3. Álvarez, V., Sánchez-Ferrero, E., Beetz, C., Díaz, M., Alonso, B., Corao, A.I., Gámez, J., Esteban, J., Gonzalo, J.F., Pascual-Pascual, S.I., et al. (2010). Mutational spectrum of the *SPG4 (SPAST)* and *SPG3A (ATL1)* genes in Spanish patients with hereditary spastic paraplegia. *BMC Neurol* 10, 89.
4. Miura, S., Shibata, H., Kida, H., Noda, K., Toyama, T., Iwasaki, N., Iwaki, A., Ayabe, M., Aizawa, H., Taniwaki, T., et al. (2011). Partial *SPAST* and *DPY30* deletions in a Japanese spastic paraplegia type 4 family. *Neurogenetics* 12, 25-31.
5. Sulek, A., Elert, E., Rajkiewicz, M., Zdzienicka, E., Stepniak, I., Krysa, W., and Zaremba, J. (2013). Screening for the hereditary spastic paraplaegias *SPG4* and *SPG3A* with the multiplex ligation-dependent probe amplification technique in a large population of affected individuals. *Neurol Sci* 34, 239-242.

6. Loureiro, J.L., Brandão, E., Ruano, L., Brandão, A.F., Lopes, A.M., Thieleke-Matos, C., Miller-Fleming, L., Cruz, V.T., Barbosa, M., Silveira, I., et al. (2013). Autosomal dominant spastic paraplegias: a review of 89 families resulting from a Portuguese survey. *JAMA Neurol* 70, 481-487.
